# Supplementary material for: LncRNA H19 was a prognostic biomarker associated with immune infiltrates in stomach adenocarcinoma
Source: Research Square preprint supplement (doi:10.21203/rs.3.rs-4135393/v1), 2024-03-25
Supplement: Supplementary file 1 [file 098910d5b0d1e3cc4863f797.xlsx]

## Sheet: 0
	Well	Fluor	Target	Content	Sample	Melt Temperature	Peak Height	Begin Temperature	End Temperature	Well Note
	A01	SYBR		Unkn		84.5	181.838	77.5	90
	A02	SYBR		Unkn		84.5	197.525	78	94
	A03	SYBR		Unkn		84.5	190.688	77.5	90.5
	A04	SYBR		Unkn		88	152.465	82.5	91
	A05	SYBR		Unkn		88	137.442	83	91.5
	A06	SYBR		Unkn		88	165.374	83	91.5
	A07	SYBR		Unkn		88	159.184	82.5	91.5
	A08	SYBR		Unkn		88	153.169	82.5	91.5
	A09	SYBR		Unkn		88	149.4	76	91.5
	A10	SYBR		Unkn		85	123.027	76	95
	A11	SYBR		Unkn		None	None	None	None
	A12	SYBR		Unkn		None	None	None	None
	B01	SYBR		Unkn		79.5	223.188	74.5	83.5
	B02	SYBR		Unkn		79	257.793	74	83.5
	B03	SYBR		Unkn		79.5	244.888	74	84
	B04	SYBR		Unkn		79	271.218	73	87
	B05	SYBR		Unkn		79.5	276.681	73.5	85.5
	B06	SYBR		Unkn		79.5	268.91	73	85
	B07	SYBR		Unkn		79.5	266.47	73.5	84.5
	B08	SYBR		Unkn		79	257.991	74	87
	B09	SYBR		Unkn		79	254.433	73.5	85
	B10	SYBR		Unkn		79.5	244.877	74.5	84
	B11	SYBR		Unkn		79.5	258.141	75	88.5
	B12	SYBR		Unkn		75.5	294.522	68	84.5
	C01	SYBR		Unkn		84.5	199.244	78.5	94.5
	C02	SYBR		Unkn		85	201.586	76.5	94.5
	C03	SYBR		Unkn		85	226.046	78	89
	C04	SYBR		Unkn		85	130.552	76.5	91
	C05	SYBR		Unkn		85	126.464	78	91
	C06	SYBR		Unkn		85	132.719	75.5	95
	C07	SYBR		Unkn		88	178.841	77.5	91.5
	C08	SYBR		Unkn		88	167.183	82	91.5
	C09	SYBR		Unkn		88	166.738	82.5	91.5
	C10	SYBR		Unkn		87.5	154.374	82.5	91
	C11	SYBR		Unkn		87.5	146.092	82.5	91
	C12	SYBR		Unkn		None	None	None	None
	D01	SYBR		Unkn		79.5	224.493	74	84
	D02	SYBR		Unkn		79.5	240.916	74	84
	D03	SYBR		Unkn		79.5	263.024	75	84
	D04	SYBR		Unkn		79.5	270.252	74	84
	D05	SYBR		Unkn		79.5	238.745	73.5	84
	D06	SYBR		Unkn		79.5	272.621	73.5	84
	D07	SYBR		Unkn		79.5	267.867	74	84
	D08	SYBR		Unkn		79.5	270.338	74	85
	D09	SYBR		Unkn		79.5	285.559	73.5	87
	D10	SYBR		Unkn		79.5	257.266	74	84
	D11	SYBR		Unkn		79.5	261.248	74	86
	D12	SYBR		Unkn		79.5	262.761	74	84.5
	E01	SYBR		Unkn		84.5	195.463	78	95
	E02	SYBR		Unkn		84.5	198.705	76	90.5
	E03	SYBR		Unkn		84.5	213.705	78	95
	E04	SYBR		Unkn		88	150.488	82	91.5
	E05	SYBR		Unkn		88	156.198	77.5	95
	E06	SYBR		Unkn		88	174.57	77	91.5
	E07	SYBR		Unkn		None	None	None	None
	E08	SYBR		Unkn		None	None	None	None
	E09	SYBR		Unkn		None	None	None	None
	E10	SYBR		Unkn		None	None	None	None
	E11	SYBR		Unkn		None	None	None	None
	E12	SYBR		Unkn		None	None	None	None
	F01	SYBR		Unkn		79.5	235.684	73.5	84
	F02	SYBR		Unkn		79.5	242.358	74	84
	F03	SYBR		Unkn		79.5	256.328	75	84
	F04	SYBR		Unkn		79.5	277.949	73.5	88
	F05	SYBR		Unkn		79.5	281.9	74	84.5
	F06	SYBR		Unkn		79.5	309.127	73.5	84.5
	F07	SYBR		Unkn		None	None	None	None
	F08	SYBR		Unkn		None	None	None	None
	F09	SYBR		Unkn		None	None	None	None
	F10	SYBR		Unkn		None	None	None	None
	F11	SYBR		Unkn		None	None	None	None
	F12	SYBR		Unkn		None	None	None	None
	G01	SYBR		Unkn		None	None	None	None
	G02	SYBR		Unkn		None	None	None	None
	G03	SYBR		Unkn		None	None	None	None
	G04	SYBR		Unkn		None	None	None	None
	G05	SYBR		Unkn		None	None	None	None
	G06	SYBR		Unkn		None	None	None	None
	G07	SYBR		Unkn		None	None	None	None
	G08	SYBR		Unkn		None	None	None	None
	G09	SYBR		Unkn		None	None	None	None
	G10	SYBR		Unkn		None	None	None	None
	G11	SYBR		Unkn		None	None	None	None
	G12	SYBR		Unkn		None	None	None	None
	H01	SYBR		Unkn		None	None	None	None
	H02	SYBR		Unkn		None	None	None	None
	H03	SYBR		Unkn		None	None	None	None
	H04	SYBR		Unkn		None	None	None	None
	H05	SYBR		Unkn		None	None	None	None
	H06	SYBR		Unkn		None	None	None	None
	H07	SYBR		Unkn		None	None	None	None
	H08	SYBR		Unkn		None	None	None	None
	H09	SYBR		Unkn		None	None	None	None
	H10	SYBR		Unkn		None	None	None	None
	H11	SYBR		Unkn		None	None	None	None
	H12	SYBR		Unkn		None	None	None	None

## Sheet: Run Information
File Name	admin_2024-03-04 14-12-58_BR011103.pcrd
Created By User	admin
Notes
ID
Run Started	03/04/2024 06:13:12 UTC
Run Ended	03/04/2024 08:07:15 UTC
Sample Vol	10
Lid Temp	105
Protocol File Name	1.prcl
Plate Setup File Name	2.pltd
Base Serial Number	BR011103
Optical Head Serial Number	788BR10790
CFX Maestro Version	5.2.008.0222.
