# Supplementary material for: LncRNA H19 was a prognostic biomarker associated with immune infiltrates in stomach adenocarcinoma
Source: Research Square preprint supplement (doi:10.21203/rs.3.rs-4135393/v1), 2024-03-25
Supplement: Supplementary file 2 [file 20430b9162919feee97b057e.xlsx]

## Sheet: 0
	Well	Fluor	Target	Content	Sample	Biological Set Name	Cq	Cq	Cq Std. Dev	Starting Quantity (SQ)	Log Starting Quantity	SQ Mean	SQ Std. Dev	Set Point	Well Note
	A01	SYBR		Unkn			23.0541	23.0541	0				0	72
	A02	SYBR		Unkn			23.0399	23.0399	0				0	72
	A03	SYBR		Unkn			22.9266	22.9266	0				0	72
	A04	SYBR		Unkn			27.918	27.918	0				0	72
	A05	SYBR		Unkn			27.7346	27.7346	0				0	72
	A06	SYBR		Unkn			27.5607	27.5607	0				0	72
	A07	SYBR		Unkn			28.2979	28.2979	0				0	72
	A08	SYBR		Unkn			28.1424	28.1424	0				0	72
	A09	SYBR		Unkn			28.3577	28.3577	0				0	72
	A10	SYBR		Unkn			28.8741	28.8741	0				0	72
	A11	SYBR		Unkn			28.3108	28.3108	0				0	72
	A12	SYBR		Unkn			28.2691	28.2691	0			0	0	72
	B01	SYBR		Unkn			20.1162	20.1162	0				0	72
	B02	SYBR		Unkn			19.951	19.951	0				0	72
	B03	SYBR		Unkn			19.9221	19.9221	0				0	72
	B04	SYBR		Unkn			25.7946	25.7946	0				0	72
	B05	SYBR		Unkn			25.7173	25.7173	0				0	72
	B06	SYBR		Unkn			25.7711	25.7711	0				0	72
	B07	SYBR		Unkn			24.9323	24.9323	0				0	72
	B08	SYBR		Unkn			24.8945	24.8945	0				0	72
	B09	SYBR		Unkn			25.1077	25.1077	0				0	72
	B10	SYBR		Unkn			21.3663	21.3663	0				0	72
	B11	SYBR		Unkn			21.251	21.251	0				0	72
	B12	SYBR		Unkn			21.1771	21.1771	0				0	72
	C01	SYBR		Unkn			26.2984	26.2984	0				0	72
	C02	SYBR		Unkn			26.2286	26.2286	0				0	72
	C03	SYBR		Unkn			26.0538	26.0538	0				0	72
	C04	SYBR		Unkn			22.7672	22.7672	0				0	72
	C05	SYBR		Unkn			22.7165	22.7165	0				0	72
	C06	SYBR		Unkn			22.7521	22.7521	0				0	72
	C07	SYBR		Unkn			24.3409	24.3409	0				0	72
	C08	SYBR		Unkn			24.1869	24.1869	0				0	72
	C09	SYBR		Unkn			24.4191	24.4191	0				0	72
	C10	SYBR		Unkn			25.1827	25.1827	0				0	72
	C11	SYBR		Unkn			25.1481	25.1481	0				0	72
	C12	SYBR		Unkn			25.2959	25.2959	0				0	72
	D01	SYBR		Unkn			16.0384	16.0384	0				0	72
	D02	SYBR		Unkn			16.0144	16.0144	0				0	72
	D03	SYBR		Unkn			15.7075	15.7075	0				0	72
	D04	SYBR		Unkn			21.5976	21.5976	0				0	72
	D05	SYBR		Unkn			21.646	21.646	0				0	72
	D06	SYBR		Unkn			21.3332	21.3332	0				0	72
	D07	SYBR		Unkn			22.3826	22.3826	0				0	72
	D08	SYBR		Unkn			22.4611	22.4611	0				0	72
	D09	SYBR		Unkn			22.2691	22.2691	0				0	72
	D10	SYBR		Unkn			23.5647	23.5647	0				0	72
	D11	SYBR		Unkn			23.594	23.594	0				0	72
	D12	SYBR		Unkn			23.5199	23.5199	0				0	72
	E01	SYBR		Unkn			23.879	23.879	0				0	72
	E02	SYBR		Unkn			23.5944	23.5944	0				0	72
	E03	SYBR		Unkn			23.6083	23.6083	0				0	72
	E04	SYBR		Unkn			28.3904	28.3904	0				0	72
	E05	SYBR		Unkn			28.4613	28.4613	0				0	72
	E06	SYBR		Unkn			28.1987	28.1987	0				0	72
	E07	SYBR		Unkn					0			0	0	72
	E08	SYBR		Unkn					0			0	0	72
	E09	SYBR		Unkn					0			0	0	72
	E10	SYBR		Unkn					0			0	0	72
	E11	SYBR		Unkn					0			0	0	72
	E12	SYBR		Unkn					0			0	0	72
	F01	SYBR		Unkn			19.2284	19.2284	0				0	72
	F02	SYBR		Unkn			19.1575	19.1575	0				0	72
	F03	SYBR		Unkn			19.0913	19.0913	0				0	72
	F04	SYBR		Unkn			24.083	24.083	0				0	72
	F05	SYBR		Unkn			24.0716	24.0716	0				0	72
	F06	SYBR		Unkn			23.831	23.831	0				0	72
	F07	SYBR		Unkn					0			0	0	72
	F08	SYBR		Unkn					0			0	0	72
	F09	SYBR		Unkn					0			0	0	72
	F10	SYBR		Unkn					0			0	0	72
	F11	SYBR		Unkn					0			0	0	72
	F12	SYBR		Unkn					0			0	0	72
	G01	SYBR		Unkn					0			0	0	72
	G02	SYBR		Unkn					0			0	0	72
	G03	SYBR		Unkn					0			0	0	72
	G04	SYBR		Unkn					0			0	0	72
	G05	SYBR		Unkn					0			0	0	72
	G06	SYBR		Unkn					0			0	0	72
	G07	SYBR		Unkn					0			0	0	72
	G08	SYBR		Unkn					0			0	0	72
	G09	SYBR		Unkn					0			0	0	72
	G10	SYBR		Unkn					0			0	0	72
	G11	SYBR		Unkn					0			0	0	72
	G12	SYBR		Unkn					0			0	0	72
	H01	SYBR		Unkn					0			0	0	72
	H02	SYBR		Unkn					0			0	0	72
	H03	SYBR		Unkn					0			0	0	72
	H04	SYBR		Unkn					0			0	0	72
	H05	SYBR		Unkn					0			0	0	72
	H06	SYBR		Unkn					0			0	0	72
	H07	SYBR		Unkn					0			0	0	72
	H08	SYBR		Unkn					0			0	0	72
	H09	SYBR		Unkn					0			0	0	72
	H10	SYBR		Unkn					0			0	0	72
	H11	SYBR		Unkn					0			0	0	72
	H12	SYBR		Unkn					0			0	0	72

## Sheet: Run Information
File Name	admin_2024-03-04 14-12-58_BR011103.pcrd
Created By User	admin
Notes
ID
Run Started	03/04/2024 06:13:12 UTC
Run Ended	03/04/2024 08:07:15 UTC
Sample Vol	10
Lid Temp	105
Protocol File Name	1.prcl
Plate Setup File Name	2.pltd
Base Serial Number	BR011103
Optical Head Serial Number	788BR10790
CFX Maestro Version	5.2.008.0222.
