# Supplementary material for: LncRNA H19 was a prognostic biomarker associated with immune infiltrates in stomach adenocarcinoma
Source: Research Square preprint supplement (doi:10.21203/rs.3.rs-4135393/v1), 2024-03-25
Supplement: Supplementary file 3 [file 2eccb105a4c84ed4c050f754.xlsx]

## Sheet: SYBR
	Cycle	A1	A2	A3	A4	A5	A6	A7	A8	A9	A10	A11	A12	B1	B2	B3	B4	B5	B6	B7	B8	B9	B10	B11	B12	C1	C2	C3	C4	C5	C6	C7	C8	C9	C10	C11	C12	D1	D2	D3	D4	D5	D6	D7	D8	D9	D10	D11	D12
	1	-10.2932	-11.6122	-7.72585	-13.2897	-9.95492	-17.6298	-20.2477	-16.5595	-16.467	-22.5557	-21.7414	-58.9771	-13.0875	-10.8775	-10.3286	-11.6333	-13.2681	-16.1538	-15.7867	-15.9312	-14.1591	-12.3398	-19.8284	-18.0513	-19.0751	-8.87322	-10.3701	-11.8451	-7.54499	-15.4176	-7.69426	-14.6049	-10.1567	-8.45523	-8.45847	-13.4481	-16.5589	-7.68417	-24.7112	-6.32359	-7.67063	-4.92365	-11.5928	-9.68698	-17.3663	-45.9805	-11.886	-23.0807
	2	1.79285	-1.75756	1.72175	1.01671	1.8179	1.37403	-7.03407	-6.86529	-0.234912	-1.98314	-2.3778	-21.8298	1.55461	2.51559	-1.30067	-3.26996	-5.27151	-0.727069	-0.378051	-0.173455	-3.07821	1.7397	-1.56602	3.3139	0.11408	-4.51038	-5.59846	-3.62937	-1.13688	-7.71553	-1.0384	-2.69268	-3.17549	0.690288	0.072125	4.0402	-0.312059	-1.97264	-6.92096	-4.17175	3.94005	-3.47344	-2.4618	-0.327153	-1.54857	4.93962	-4.22976	-5.08403
	3	2.97021	-3.51276	2.43194	0.183199	4.41266	0.374586	-2.73198	-3.12558	-1.18472	-3.2077	-0.535798	-14.9861	2.62582	2.68891	-0.792232	1.13868	-0.533089	-1.45723	3.7692	-0.112907	0.835788	-3.70503	-0.401114	4.47696	3.8533	1.07114	-1.04858	0.364342	-0.866193	-3.39644	0.684078	2.54402	2.40253	3.15781	0.710972	2.45553	1.11968	3.69112	-2.61483	-2.38942	-0.129319	-0.551787	-1.43894	-0.226143	0.744529	-0.767169	1.05579	-0.142831
	4	2.01687	3.34952	-0.35828	1.32861	2.66432	1.13354	0.463138	-2.152	0.475721	-0.46661	-0.578851	-7.84672	-1.07976	4.36178	1.08807	-1.62847	2.65991	-1.51001	0.0469439	3.12015	-1.94127	3.05298	1.24563	6.80975	4.89642	4.41173	-0.541288	0.342404	2.17269	2.77367	-1.1641	-0.291611	0.163536	-0.267137	-0.319955	0.335649	1.59536	1.78671	5.63984	2.41017	1.06376	-2.23095	-1.05053	0.801669	3.63186	2.49707	-0.590811	-0.0294727
	5	-3.13028	3.63078	3.39784	1.92742	2.04043	2.90106	-1.82828	0.304802	-0.364674	0.778335	0.256543	-5.9882	0.490612	-1.93101	0.861652	0.313628	1.7647	0.983521	3.12284	-0.385404	-0.520982	4.16729	3.14922	5.31546	2.28895	3.98692	4.38497	0.516395	0.106455	-0.709995	2.97429	0.852305	2.82225	-3.43604	-0.172226	-0.428329	4.78284	-0.545685	3.97858	2.94042	-0.388961	4.85411	2.12078	2.67389	3.78538	1.15477	-0.283248	-0.971389
	6	-1.51312	0.591891	-0.261449	0.864807	2.32559	0.133586	-1.29993	4.03875	0.161034	3.55862	2.40799	-6.42167	-0.629245	-3.44602	0.639025	-0.836467	0.645058	0.64308	0.731946	-2.33582	2.49815	-0.582247	0.506534	-1.10066	-1.20388	2.05382	3.30059	-0.21477	0.255887	1.23904	-1.30731	0.961905	-1.23071	3.31594	0.504881	1.07774	-0.988427	-2.39011	8.34756	-1.58544	3.23065	3.95586	1.45758	2.94044	-2.94993	4.12587	-0.567516	3.14744
	7	-1.40796	-0.769496	-1.64755	-2.6467	-0.348273	5.1419	-2.96702	-0.183407	1.42816	0.423896	0.570966	-3.82794	-1.14386	0.0663572	4.56027	2.53545	0.927156	-1.79315	-1.03565	6.1863	0.678716	1.52647	-2.03471	0.534384	-0.285278	-2.16194	0.562823	1.28308	-0.413427	2.4734	2.67019	1.19388	0.198	-1.32153	0.318738	-0.985889	-3.25027	-2.23501	-10.7774	0.310458	2.67254	-0.0127234	0.480878	0.552382	0.297185	-1.50898	1.0956	1.67083
	8	-1.63104	1.62021	0.986114	1.23238	-2.02072	-0.929915	4.38587	-0.314223	-4.01567	-0.283493	0.914817	-3.83938	1.3549	-0.269405	-0.58271	0.688344	-1.0601	4.42386	-0.63229	-1.1005	0.463214	0.0308216	1.60582	-2.154	-1.00949	-1.94869	2.70679	0.72195	2.27267	1.98742	0.996494	-3.73938	-1.9112	3.07318	2.02795	-0.728099	-3.26494	0.230778	-8.55735	2.53843	2.50627	0.679969	-1.84076	4.04177	1.95182	2.47222	-0.0285047	-2.27443
	9	3.85438	1.48294	1.32607	1.14718	-1.03098	2.73677	1.51365	4.52891	3.95448	-0.310714	2.02357	-3.09848	-0.699507	0.767357	-2.36615	-1.25831	-0.861144	0.104974	-1.32237	-2.65403	0.513609	2.76832	0.371925	-6.27024	-0.64417	2.49125	1.96143	2.90771	-0.15648	-3.94911	-0.124395	-1.89965	-2.08307	0.614159	-1.35166	-0.190097	-3.57463	0.444857	-4.87644	1.68274	-2.94651	0.61571	0.406195	-0.191737	0.360049	0.121641	0.624266	4.11714
	10	3.01311	0.475817	-2.16655	-0.0593815	0.295765	-3.44466	2.07599	2.4544	4.49595	-0.0792146	1.06236	0.24338	0.664151	0.274559	0.173287	3.47919	-1.75179	0.503227	-0.0910451	2.28594	3.0706	1.05492	-0.087042	-9.10512	-2.12006	1.7584	1.19406	0.943036	1.63343	1.98087	1.68716	2.98288	-1.34606	2.14095	-0.925396	5.05634	-1.6873	-0.423658	-1.90728	0.311076	-0.811133	-1.44829	4.16307	-0.0123278	-2.89954	-1.86257	2.9986	2.9414
	11	-1.60356	-3.05087	-0.661217	1.57414	2.77036	-1.17175	2.40736	-0.234203	-1.93903	3.65431	5.40994	-0.84529	-0.432746	-2.68617	-2.60579	0.267666	-1.46057	4.90783	-1.61009	-0.91407	0.568723	0.253802	-0.592375	-6.13392	-1.64883	-1.37828	-3.11594	-0.773392	-1.46634	3.147	1.89038	-1.05307	2.91348	-0.273408	2.10335	-1.75087	-0.560696	-1.17781	1.42968	-0.177745	-1.54451	0.87906	3.33888	-2.64573	1.36848	-1.67184	2.72982	-3.9237
	12	2.58955	-1.06407	-1.2306	-1.33545	-1.63063	-0.748047	5.96159	-0.335183	1.87052	3.94553	-0.869447	-2.64719	0.81432	3.69735	2.72427	-1.75023	3.08218	3.56896	0.869582	-0.502817	-0.932133	-3.94068	1.48428	7.47351	-3.5725	-2.01003	-0.414362	0.233575	2.76829	2.42214	0.0467761	0.511468	3.55698	0.098267	-0.0513036	-2.09159	7.25483	4.7101	8.09098	0.896368	-2.20144	-1.79044	1.17391	-2.08901	-4.64508	-2.00695	-1.23625	-2.08154
	13	1.38628	-0.201237	-1.63359	2.76107	-1.49338	0.491947	2.28296	0.177983	3.26357	-0.612421	0.963116	1.85044	1.74708	0.244974	-3.87318	-0.198555	-0.557916	-1.75143	1.21912	-0.85904	0.378947	-4.93144	-3.01578	6.22706	-0.746609	0.530395	-1.91543	0.436665	0.552979	0.0184681	1.05383	-1.3081	1.02732	-2.88136	1.98296	4.26221	13.5227	16.4531	17.5082	-0.303007	0.359751	-3.31208	-0.828042	-1.10879	-1.25994	-1.08474	0.0838383	1.74513
	14	-0.633223	-2.55675	-0.951207	-0.703558	-0.501831	-1.26152	0.803323	0.616109	-0.905796	-0.507908	0.402155	2.55624	0.216443	1.7104	0.059959	-3.92043	-1.21038	0.204989	2.02543	-0.812561	0.804651	-1.76923	-1.52758	8.87141	-0.218917	-3.75206	-1.65957	-1.71641	-1.9334	-0.413172	-1.30088	3.51325	-1.18927	-1.20233	2.43712	5.51965	32.2379	33.8223	36.1033	-2.30056	0.338401	-0.638808	2.47523	-0.288299	-5.15041	-0.573324	-0.364589	-3.05315
	15	0.880663	-2.15421	1.12637	1.75598	-3.75199	-3.13198	0.939072	0.224927	-0.37086	-1.93816	0.467501	1.11587	-0.13569	0.702901	4.44114	2.9631	2.68455	-2.01341	3.60185	1.59566	-1.0365	-1.90037	-1.55473	3.26027	-3.36733	-1.41459	-2.53469	0.368191	-1.45341	0.38854	-0.125225	2.56911	-1.9254	0.905304	-1.8433	3.44227	61.9708	67.3571	73.456	-0.424919	-0.84578	1.47818	-3.19749	-5.0175	-1.84694	-1.40994	4.03594	3.54383
	16	-0.341666	3.33545	0.706274	-0.93808	-2.50261	-2.59466	1.55654	1.15148	-0.409733	-0.709543	-3.33101	0.334819	9.34169	7.81807	9.07645	0.192634	-1.10058	-2.23209	-1.90018	-1.00467	-1.8654	1.13128	0.343274	7.61783	-1.91449	0.33933	-4.84149	-3.34558	-1.19886	-0.514836	1.21316	-4.60783	1.17607	-1.40887	-0.348174	2.94837	116.765	118.57	139.047	2.67944	0.913612	4.82257	-0.251159	-2.12349	3.5499	-0.961297	-3.01685	-0.422232
	17	0.307135	0.923799	1.62918	-3.53171	-2.07355	-0.439278	-0.267053	-1.57132	-0.220679	0.712782	-1.3372	0.628806	18.2102	18.2858	17.4276	-0.857823	-2.30831	-2.47737	-2.72322	-2.08934	-0.883053	7.21606	5.48759	5.48704	-1.63007	-3.81678	-0.554476	-2.17031	-1.56873	0.854779	-0.723653	-0.759907	1.66637	3.47059	-1.65143	-1.22884	197.326	208.443	239.161	1.19008	4.11436	1.87859	-2.04123	-3.71308	2.47754	1.68406	0.047241	-1.89962
	18	0.164152	2.63949	2.80985	-2.82312	-5.6353	-2.99442	-0.294346	0.770504	1.04327	-4.84521	-5.60844	4.1762	32.2727	35.4477	38.7532	-0.830555	-1.95281	0.285434	-1.20938	2.7628	-3.37467	9.31076	11.2071	17.7479	-0.00573013	-1.76376	-3.82279	-0.933833	0.775772	0.902438	-2.84792	-1.03144	-4.3948	0.344737	2.0241	2.13449	311.084	327.352	372.387	10.97	4.71903	14.325	2.58526	3.59934	5.58513	0.874485	0.779371	1.84904
	19	4.93161	6.81915	8.48784	-4.17146	-1.93617	-1.02269	-1.51443	0.786255	-2.19709	-1.93617	-2.95577	4.54673	62.6356	64.507	65.3725	-0.360388	-1.41081	-3.07657	-2.20596	0.559361	2.24454	22.7384	27.0523	27.5429	-1.75514	-5.61105	0.455034	2.8856	1.61645	-1.19531	-2.74366	-1.9452	2.1792	-2.00378	-2.08305	-0.755388	432.484	454.866	505.361	19.2858	16.7553	19.8119	8.39109	10.1787	9.1678	4.84731	4.29732	1.71708
	20	14.33	18.7919	21.4249	-0.602317	-2.72362	-2.93514	0.154766	0.980724	-2.80799	-1.63021	-4.06037	-1.13348	111.048	122.715	124.468	2.13077	4.19454	-4.11311	1.20562	2.26567	3.9546	47.0767	51.5534	56.0045	-4.2569	-2.25211	-0.670141	4.48099	2.7077	0.710534	-0.316096	-0.34692	1.31913	0.135803	1.41748	-1.71383	540.925	571.972	630.614	38.0899	36.2886	44.6267	21.5815	17.6093	28.7152	12.5262	9.54588	11.048
	21	30.0258	29.2281	39.3345	1.36709	1.73898	-0.829457	-2.97934	-3.48493	-1.90945	-2.22734	0.860637	1.38366	186.869	209.449	216.749	0.711924	2.71751	1.50486	7.25306	10.0608	6.58688	94.8708	100.763	105.369	0.951495	-3.80485	2.00786	5.93419	8.37303	11.0777	-4.61769	3.28328	1.91916	3.93188	-0.793383	0.182347	632.676	670.799	727.593	78.9818	80.8154	92.8925	47.2862	43.7682	52.1195	22.8088	24.0566	24.4546
	22	61.4232	60.5852	65.4515	0.415867	-0.513049	2.54348	0.324749	2.49892	3.17527	-0.421447	-4.05979	3.18086	297.88	340.485	340.495	10.9851	9.31236	7.0254	12.3567	17.3603	17.0138	163.104	176.866	187.18	5.1182	6.81967	10.0289	18.234	18.2517	20.8285	3.42548	2.63967	3.96387	2.80115	2.11786	1.07857	690.762	737.034	798.742	147.386	141.257	173.842	90.7878	87.5931	99.2637	48.0835	41.1311	43.9041
	23	115.681	116.293	124.175	-0.720968	3.69826	2.08787	-1.33557	-0.619145	2.45126	-3.06015	-0.390165	4.18491	414.469	487.389	471.344	18.7267	16.833	16.0906	29.0754	36.1028	31.2543	266.836	286.911	300.528	7.58184	13.259	14.3045	39.7307	37.8176	40.5754	8.0235	9.27607	10.7685	9.21356	8.8993	3.98449	730.856	782.548	844.098	249.806	236.034	289.547	166.779	157.571	175.814	83.4547	80.2614	83.6728
	24	192.959	205.662	212.821	7.64795	11.6638	7.75446	2.05657	7.87116	5.88946	0.029171	-2.28987	0.871277	523.06	628.031	592.032	40.0911	36.8155	33.4512	63.9742	68.9486	59.8137	394.421	420.782	435.179	29.4752	23.3448	34.1308	75.5328	73.4786	75.8905	16.6542	23.9104	22.493	19.2424	19.4339	13.2065	755.403	809.888	881.565	395.421	373.668	451.201	279.966	268.583	298.028	147.93	146.934	153.28
	25	307.198	324.154	342.374	17.9928	16.4169	20.2698	8.02914	12.493	12.3043	9.03955	1.08009	5.04102	608.932	744.768	687.694	69.5551	75.1794	71.4452	123.92	125.865	111.091	515.615	546.21	558.979	50.1721	46.3493	63.6469	133.315	138.212	134.355	49.7614	43.53	46.3593	41.9569	42.2989	26.9051	780.605	838.334	907.692	539.479	505.993	608.824	428.443	413.641	445.672	254.658	253.051	257.566
	26	438.509	460.473	477.592	34.1812	39.0931	46.1145	26.9894	31.673	24.175	15.595	13.6664	4.93156	670.144	820.946	754.214	132.862	137.474	134.236	216.011	217.744	192.546	618.554	651.921	661.451	97.3102	102.674	115.125	238.508	237.039	234.474	92.6379	79.3973	90.2438	80.0516	77.4953	57.7051	804.645	859.784	934.887	669.319	627.206	752.449	572.225	556.239	589.502	392.304	389.431	399.308
	27	556.978	586.504	602.404	71.7034	77.5951	80.857	53.8022	58.7635	49.3748	38.0137	21.3973	8.45963	709.043	858.895	798.441	236.982	237.996	231.825	357.929	348.212	314.758	694.279	728.311	735.627	172.894	177.878	203.244	380.669	379.701	378.255	172.506	148.34	160.906	138.364	142.866	99.8373	820.703	875.321	952.25	771.54	719.976	862.838	696.168	681.463	718.174	527.43	521.738	536.052
	28	656.704	693.904	709.199	124.164	135.136	150.424	96.6976	108.005	91.8574	67.3586	55.6506	10.4628	735.131	880.092	830.636	370.622	380.828	366.79	503.15	487.819	460.061	746.488	779.722	789.634	283.488	288.952	335.679	527.848	524.075	524.548	289.158	250.21	266.178	236.114	238.525	167.517	836.381	888.14	970.729	839.702	785.464	937.152	788.745	775.719	810.296	650.746	640.051	656.672
	29	729.203	785.139	786.808	211.232	222.854	248.299	174.445	191.264	170.148	127.428	95.7725	12.0486	759.45	890.093	854.69	505.544	522.745	504.127	643.015	619.124	592.073	782.043	815.71	829.177	420.338	431.03	484.718	671.099	664.034	665.659	447.716	395.796	408.873	378.202	376.227	252.578	844.781	895.883	982.632	883.669	825.778	982.313	847.784	835.206	871.692	738.62	726.748	744.273
	30	785.433	852.553	839.088	332.652	337.857	387.435	289.064	304.067	277.38	211.248	173.28	9.79491	776.14	907.74	875.454	633.705	652.723	633.176	746.609	722.855	696.593	809.302	843.246	863.057	548.958	560.803	625.128	792.458	781.292	784.434	603.818	545.062	549.185	523.509	516.097	318.291	858.452	907.973	997.694	913.186	853.717	1014.64	886.008	872.916	907.616	796.819	782.78	801.484
	31	822.911	889.899	874.971	459.056	452.458	526.915	442.158	448.502	416.951	336.659	287.506	10.0064	796.477	932.611	896.503	727.327	749.956	728.397	812.583	785.092	765.33	829.641	864.617	887.347	665.349	675.253	747.903	880.299	866.452	869.443	750.616	686.424	681.114	661.384	648.87	382.209	864.634	913.192	1007.79	937.434	875.151	1040.63	912.914	898.052	936.3	830.357	816.666	836.292
	32	846.575	905.936	898.08	580.781	556.605	662.112	593.869	585.072	554.308	467.622	407.111	9.86973	807.87	948.19	907.926	787.382	812.114	789.112	845.149	817.54	801.87	846.878	880.163	907.368	751.369	760.703	837.331	937.739	921.153	925.868	867.209	804.505	786.058	774.247	762.044	442.101	873.386	921.675	1020.19	956.691	894.399	1062.39	932.904	918.448	955.859	855.838	837.623	858.183
	33	860.914	916.637	917.718	683.78	640.82	769.767	734.441	704.507	682.798	591.817	526.204	5.06437	822.251	960.812	919.878	821.813	846.907	822.065	864.879	838.8	822.755	861.476	894.79	922.377	816.409	821.979	898.903	976.979	957.152	961.685	953.29	889.902	863.302	858	845.007	498.251	877.555	928.196	1028.18	972.476	909.395	1079.56	949.071	936.126	975.241	874.929	856.126	874.871
	34	869.982	947.882	933.194	760.296	699.955	851.069	847.609	797.35	782.538	698.31	625.738	6.77972	831.598	966.206	929.765	845.295	871.587	845.401	882.268	854.961	837.923	873.428	907.628	936.716	858.801	863.895	939.317	1005.35	983.131	989.282	1009.18	949.406	914.031	916.827	901.558	546.487	886.955	936.562	1039.76	987.273	922.392	1094.51	962.29	950.857	989.399	896.455	871.555	888.529
	35	881.505	961.238	943.181	814.575	740.881	907.234	927.009	860.832	852.712	771.216	705.061	3.57872	843.01	980.381	939.791	865.15	892.934	865.487	898.024	872.983	852.532	883.92	919.144	949.091	889.634	892.922	967.144	1028.54	1003.1	1013.06	1047.15	989.606	949.591	956.91	937.101	583.443	891.764	942.951	1046.66	1000.41	933.878	1106.21	974.547	962.334	1004.93	913.07	886.952	902.399
	36	890.272	976.046	956.351	853.033	770.12	947.507	979.518	903.543	895.331	824.513	755.048	1.11374	852.951	990.309	947.628	882.859	910.233	882.773	914.274	885.543	865.672	891.705	927.964	958.774	911.728	913.182	988.457	1044.98	1020.28	1028.8	1076.51	1019.66	976.92	984.059	964.105	612.447	898.585	947.124	1054.77	1012.8	943.993	1117.31	984.038	971.658	1015.66	930.428	898.15	915.922
	37	898.635	974.801	963.511	883.14	794.28	977.67	1015.56	931.836	926.962	857.344	797.149	-1.34613	861.607	1002.95	955.459	898.681	925.636	898.983	927.504	898.661	876.792	900.316	935.991	966.871	930.441	928.479	1005.27	1058.39	1035.99	1043.43	1097.63	1041.61	997.842	1004.24	985.435	630.011	900.731	950.17	1059.25	1020.6	952.379	1126.51	994.802	981.066	1027.77	940.285	909.839	928.797
	38	905.682	997.524	971.957	906.7	811.322	1001.38	1043.23	954.852	950.686	886.027	821.657	-0.183341	868.7	1010.6	961.293	913.43	936.523	909.621	936.421	907.52	886.913	906.521	941.661	973.218	945.789	941.482	1020.2	1071.69	1048.06	1051.9	1114.64	1058.23	1013.48	1021	1001.75	643.083	907.866	956.061	1066.21	1027.33	958.107	1134.87	1001.86	988.341	1034.96	951.924	916.869	938.724
	39	911.037	1005.58	977.895	925.882	826.328	1019.78	1065.93	974.125	971.699	904.133	845.489	-5.09705	873.091	1016.56	966.818	923.629	947.76	920.085	944.483	918.696	895.225	913.112	946.516	978.072	957.752	957.705	1032.09	1079.66	1056.77	1063.56	1127.9	1070.32	1025.6	1034.53	1013.48	648.487	911.129	959.23	1070.44	1031.82	964.274	1141.26	1010.39	995.884	1043.84	957.71	924.92	946.068
	40	919.141	1018	983.565	940.924	837.782	1036.63	1084.31	989.825	986.77	922.968	857.918	-3.1172	876.951	1030.37	969.706	933.254	955.139	928.56	951.181	926.249	902.699	918.294	950.364	981.043	967.449	963.2	1041.75	1086.98	1064.31	1070.75	1139.54	1080.67	1035.05	1045.85	1022.13	650.891	916.483	963.098	1075.87	1036.91	970.466	1146.49	1015.02	1000.03	1047.98	965.061	928.816	948.951
	41	931.704	1012.5	989.674	953.766	852.247	1046.95	1099.14	1002.56	999.351	935.728	875.197	-6.27052	879.789	1042.86	972.837	940.829	965.238	937.487	959.488	937.182	909.307	923.353	955.271	981.989	976.508	975.013	1052.82	1097.18	1075.05	1079.36	1150.71	1090.45	1047.54	1056.39	1031.58	648.41	919.089	963.598	1079.12	1041.37	976.216	1153.44	1021.31	1006.59	1055.01	969.9	935.163	954.789
	42	944.71	1017.74	992.494	967.165	861.752	1059.57	1109.72	1012.79	1010.08	950.826	884.724	-10.279	883.214	1072.26	978.667	951.203	973.243	947.4	964.947	942.064	915.913	927.815	960.809	981.359	986.584	978.518	1061.13	1106.86	1082.79	1088.8	1159.89	1101.2	1058.96	1068.19	1041.28	640.786	924.389	969.485	1085.51	1048.46	982.128	1158.79	1026.88	1012.02	1059.71	976.278	939.941	959.663
	43	954.294	1019.24	1001.5	977.071	871.558	1067.86	1121.31	1022.59	1018.55	961.595	900.086	-9.90802	888.652	1081.53	983.934	958.482	982.782	956.65	971.625	948.479	921.267	930.161	964.465	979.164	993.199	988.416	1068.32	1116.97	1091.81	1097.13	1168.69	1110.26	1068.92	1079.36	1050.98	629.627	928.294	970.092	1091.27	1052.82	987.503	1162.81	1031.28	1016.24	1065.07	983.348	943.403	966.426
	44	961.873	1041.45	1005.77	987.25	879.398	1077.52	1130.89	1031.74	1025.47	970.809	908.172	-7.31583	892.29	1085.78	990.175	967.725	988.269	963.487	976.509	952.689	926.562	934.203	968.649	975.831	1000.34	991.336	1073.31	1123.31	1097.41	1102.67	1180.52	1119.94	1077.09	1088.83	1059.88	615.748	932.107	972.954	1098.15	1058.56	992.706	1164	1033.55	1019.36	1069.62	988.398	946.641	970.257
	45	968.565	1048.25	1010.51	994.895	888.989	1086.72	1142.35	1040.38	1030.5	980.362	917.318	-13.7942	895.939	1075.21	992.859	972.067	993.147	968.402	981.976	958.302	931.425	937.217	969.823	970.09	1006.27	999.559	1077.48	1129.06	1104.64	1107.91	1190.45	1129.06	1085.31	1095.07	1067.67	599	934.612	973.327	1102.18	1061.52	994.422	1166.64	1035.62	1022.03	1073.63	992.417	948.695	973.776
	46	975.769	1041.3	1010.75	1004.86	898.433	1099.15	1151.77	1049.17	1035.81	992.178	922.26	-11.358	897.779	1069.03	991.793	975.964	995.104	973.012	985.051	962.338	937.802	941.092	970.79	962.083	1014.65	1006.73	1078.67	1132.91	1110.19	1119.82	1200.93	1140.22	1096.13	1099.43	1075.69	579.9	937.059	978.774	1104.94	1065.87	993.664	1170.41	1040.37	1026.76	1077.27	992.532	951.815	977.282
[truncated: 48 more columns]

## Sheet: Run Information
File Name	admin_2024-03-04 14-12-58_BR011103.pcrd
Created By User	admin
Notes
ID
Run Started	03/04/2024 06:13:12 UTC
Run Ended	03/04/2024 08:07:15 UTC
Sample Vol	10
Lid Temp	105
Protocol File Name	1.prcl
Plate Setup File Name	2.pltd
Base Serial Number	BR011103
Optical Head Serial Number	788BR10790
CFX Maestro Version	5.2.008.0222.
