# Supplementary material for: LncRNA H19 was a prognostic biomarker associated with immune infiltrates in stomach adenocarcinoma
Source: Research Square preprint supplement (doi:10.21203/rs.3.rs-4135393/v1), 2024-03-25
Supplement: Supplementary file 4 [file 37d7745262805c1714b7dbd9.xlsx]

## Sheet: Standard Curve Results
	Fluor	Efficiency %	Slope	Y-Intercept	R^2
	SYBR	N/A	N/A	N/A	N/A

## Sheet: Run Information
File Name	admin_2024-03-04 14-12-58_BR011103.pcrd
Created By User	admin
Notes
ID
Run Started	03/04/2024 06:13:12 UTC
Run Ended	03/04/2024 08:07:15 UTC
Sample Vol	10
Lid Temp	105
Protocol File Name	1.prcl
Plate Setup File Name	2.pltd
Base Serial Number	BR011103
Optical Head Serial Number	788BR10790
CFX Maestro Version	5.2.008.0222.
