# Supplementary material for: LncRNA H19 was a prognostic biomarker associated with immune infiltrates in stomach adenocarcinoma
Source: Research Square preprint supplement (doi:10.21203/rs.3.rs-4135393/v1), 2024-03-25
Supplement: Supplementary file 5 [file 7ffca8a3ac8ac46cc9299323.xlsx]

## Sheet: SYBR
		1	2	3	4	5	6	7	8	9	10	11	12
A	Content	Unkn	Unkn	Unkn	Unkn	Unkn	Unkn	Unkn	Unkn	Unkn	Unkn	Unkn	Unkn
A	Sample
A	Cq	23.0541	23.0399	22.9266	27.918	27.7346	27.5607	28.2979	28.1424	28.3577	28.8741	28.3108	28.2691
A	copy number
B	Content	Unkn	Unkn	Unkn	Unkn	Unkn	Unkn	Unkn	Unkn	Unkn	Unkn	Unkn	Unkn
B	Sample
B	Cq	20.1162	19.951	19.9221	25.7946	25.7173	25.7711	24.9323	24.8945	25.1077	21.3663	21.251	21.1771
B	copy number
C	Content	Unkn	Unkn	Unkn	Unkn	Unkn	Unkn	Unkn	Unkn	Unkn	Unkn	Unkn	Unkn
C	Sample
C	Cq	26.2984	26.2286	26.0538	22.7672	22.7165	22.7521	24.3409	24.1869	24.4191	25.1827	25.1481	25.2959
C	copy number
D	Content	Unkn	Unkn	Unkn	Unkn	Unkn	Unkn	Unkn	Unkn	Unkn	Unkn	Unkn	Unkn
D	Sample
D	Cq	16.0384	16.0144	15.7075	21.5976	21.646	21.3332	22.3826	22.4611	22.2691	23.5647	23.594	23.5199
D	copy number
E	Content	Unkn	Unkn	Unkn	Unkn	Unkn	Unkn	Unkn	Unkn	Unkn	Unkn	Unkn	Unkn
E	Sample
E	Cq	23.879	23.5944	23.6083	28.3904	28.4613	28.1987
E	copy number
F	Content	Unkn	Unkn	Unkn	Unkn	Unkn	Unkn	Unkn	Unkn	Unkn	Unkn	Unkn	Unkn
F	Sample
F	Cq	19.2284	19.1575	19.0913	24.083	24.0716	23.831
F	copy number
G	Content	Unkn	Unkn	Unkn	Unkn	Unkn	Unkn	Unkn	Unkn	Unkn	Unkn	Unkn	Unkn
G	Sample
G	Cq
G	copy number
H	Content	Unkn	Unkn	Unkn	Unkn	Unkn	Unkn	Unkn	Unkn	Unkn	Unkn	Unkn	Unkn
H	Sample
H	Cq
H	copy number

## Sheet: Run Information
File Name	admin_2024-03-04 14-12-58_BR011103.pcrd
Created By User	admin
Notes
ID
Run Started	03/04/2024 06:13:12 UTC
Run Ended	03/04/2024 08:07:15 UTC
Sample Vol	10
Lid Temp	105
Protocol File Name	1.prcl
Plate Setup File Name	2.pltd
Base Serial Number	BR011103
Optical Head Serial Number	788BR10790
CFX Maestro Version	5.2.008.0222.
