# Supplementary material for: LncRNA H19 was a prognostic biomarker associated with immune infiltrates in stomach adenocarcinoma
Source: Research Square preprint supplement (doi:10.21203/rs.3.rs-4135393/v1), 2024-03-25
Supplement: Supplementary file 6 [file 988f643f8763798ecc8a79ee.xlsx]

## Sheet: 0
	Well	Fluor	Target	Content	Sample	Cq	SQ
	A01	SYBR		Unkn		23.0541											1
	A02	SYBR		Unkn		23.0399
	A03	SYBR		Unkn		22.9266
	A04	SYBR		Unkn		27.918
	A05	SYBR		Unkn		27.7346
	A06	SYBR		Unkn		27.5607
	A07	SYBR		Unkn		28.2979
	A08	SYBR		Unkn		28.1424
	A09	SYBR		Unkn		28.3577
	A10	SYBR		Unkn		28.8741
	A11	SYBR		Unkn		28.3108
	A12	SYBR		Unkn		28.2691
	B01	SYBR		Unkn		20.1162
	B02	SYBR		Unkn		19.951
	B03	SYBR		Unkn		19.9221
	B04	SYBR		Unkn		25.7946
	B05	SYBR		Unkn		25.7173
	B06	SYBR		Unkn		25.7711
	B07	SYBR		Unkn		24.9323
	B08	SYBR		Unkn		24.8945											2
	B09	SYBR		Unkn		25.1077
	B10	SYBR		Unkn		21.3663
	B11	SYBR		Unkn		21.251
	B12	SYBR		Unkn		21.1771
	C01	SYBR		Unkn		26.2984
	C02	SYBR		Unkn		26.2286
	C03	SYBR		Unkn		26.0538
	C04	SYBR		Unkn		22.7672
	C05	SYBR		Unkn		22.7165
	C06	SYBR		Unkn		22.7521
	C07	SYBR		Unkn		24.3409
	C08	SYBR		Unkn		24.1869
	C09	SYBR		Unkn		24.4191
	C10	SYBR		Unkn		25.1827
	C11	SYBR		Unkn		25.1481
	C12	SYBR		Unkn		25.2959
	D01	SYBR		Unkn		16.0384
	D02	SYBR		Unkn		16.0144
	D03	SYBR		Unkn		15.7075
	D04	SYBR		Unkn		21.5976
	D05	SYBR		Unkn		21.646
	D06	SYBR		Unkn		21.3332
	D07	SYBR		Unkn		22.3826
	D08	SYBR		Unkn		22.4611
	D09	SYBR		Unkn		22.2691
	D10	SYBR		Unkn		23.5647
	D11	SYBR		Unkn		23.594
	D12	SYBR		Unkn		23.5199
	E01	SYBR		Unkn		23.879
	E02	SYBR		Unkn		23.5944
	E03	SYBR		Unkn		23.6083
	E04	SYBR		Unkn		28.3904
	E05	SYBR		Unkn		28.4613
	E06	SYBR		Unkn		28.1987
	E07	SYBR		Unkn
	E08	SYBR		Unkn
	E09	SYBR		Unkn
	E10	SYBR		Unkn
	E11	SYBR		Unkn
	E12	SYBR		Unkn
	F01	SYBR		Unkn		19.2284
	F02	SYBR		Unkn		19.1575
	F03	SYBR		Unkn		19.0913
	F04	SYBR		Unkn		24.083
	F05	SYBR		Unkn		24.0716
	F06	SYBR		Unkn		23.831
	F07	SYBR		Unkn
	F08	SYBR		Unkn
	F09	SYBR		Unkn
	F10	SYBR		Unkn
	F11	SYBR		Unkn
	F12	SYBR		Unkn
	G01	SYBR		Unkn
	G02	SYBR		Unkn
	G03	SYBR		Unkn
	G04	SYBR		Unkn
	G05	SYBR		Unkn
	G06	SYBR		Unkn
	G07	SYBR		Unkn
	G08	SYBR		Unkn
	G09	SYBR		Unkn
	G10	SYBR		Unkn
	G11	SYBR		Unkn
	G12	SYBR		Unkn
	H01	SYBR		Unkn
	H02	SYBR		Unkn
	H03	SYBR		Unkn
	H04	SYBR		Unkn
	H05	SYBR		Unkn
	H06	SYBR		Unkn
	H07	SYBR		Unkn
	H08	SYBR		Unkn
	H09	SYBR		Unkn
	H10	SYBR		Unkn
	H11	SYBR		Unkn
	H12	SYBR		Unkn

## Sheet: Run Information
File Name	admin_2024-03-04 14-12-58_BR011103.pcrd
Created By User	admin
Notes
ID
Run Started	03/04/2024 06:13:12 UTC
Run Ended	03/04/2024 08:07:15 UTC
Sample Vol	10
Lid Temp	105
Protocol File Name	1.prcl
Plate Setup File Name	2.pltd
Base Serial Number	BR011103
Optical Head Serial Number	788BR10790
CFX Maestro Version	5.2.008.0222.
