# Supplementary material for: LncRNA H19 was a prognostic biomarker associated with immune infiltrates in stomach adenocarcinoma
Source: Research Square preprint supplement (doi:10.21203/rs.3.rs-4135393/v1), 2024-03-25
Supplement: Supplementary file 7 [file 98a047acd2489a84905c765b.xlsx]

## Sheet: 0
	Well	Fluor	Target	Content	Sample	Melt Temp
	A01	SYBR		Unkn		84.5
	A02	SYBR		Unkn		84.5
	A03	SYBR		Unkn		84.5
	A04	SYBR		Unkn		88
	A05	SYBR		Unkn		88
	A06	SYBR		Unkn		88
	A07	SYBR		Unkn		88
	A08	SYBR		Unkn		88
	A09	SYBR		Unkn		88
	A10	SYBR		Unkn		85
	A11	SYBR		Unkn		None
	A12	SYBR		Unkn		None
	B01	SYBR		Unkn		79.5
	B02	SYBR		Unkn		79
	B03	SYBR		Unkn		79.5
	B04	SYBR		Unkn		79
	B05	SYBR		Unkn		79.5
	B06	SYBR		Unkn		79.5
	B07	SYBR		Unkn		79.5
	B08	SYBR		Unkn		79
	B09	SYBR		Unkn		79
	B10	SYBR		Unkn		79.5
	B11	SYBR		Unkn		79.5
	B12	SYBR		Unkn		75.5
	C01	SYBR		Unkn		84.5
	C02	SYBR		Unkn		85
	C03	SYBR		Unkn		85
	C04	SYBR		Unkn		85
	C05	SYBR		Unkn		85
	C06	SYBR		Unkn		85
	C07	SYBR		Unkn		88
	C08	SYBR		Unkn		88
	C09	SYBR		Unkn		88
	C10	SYBR		Unkn		87.5
	C11	SYBR		Unkn		87.5
	C12	SYBR		Unkn		None
	D01	SYBR		Unkn		79.5
	D02	SYBR		Unkn		79.5
	D03	SYBR		Unkn		79.5
	D04	SYBR		Unkn		79.5
	D05	SYBR		Unkn		79.5
	D06	SYBR		Unkn		79.5
	D07	SYBR		Unkn		79.5
	D08	SYBR		Unkn		79.5
	D09	SYBR		Unkn		79.5
	D10	SYBR		Unkn		79.5
	D11	SYBR		Unkn		79.5
	D12	SYBR		Unkn		79.5
	E01	SYBR		Unkn		84.5
	E02	SYBR		Unkn		84.5
	E03	SYBR		Unkn		84.5
	E04	SYBR		Unkn		88
	E05	SYBR		Unkn		88
	E06	SYBR		Unkn		88
	E07	SYBR		Unkn		None
	E08	SYBR		Unkn		None
	E09	SYBR		Unkn		None
	E10	SYBR		Unkn		None
	E11	SYBR		Unkn		None
	E12	SYBR		Unkn		None
	F01	SYBR		Unkn		79.5
	F02	SYBR		Unkn		79.5
	F03	SYBR		Unkn		79.5
	F04	SYBR		Unkn		79.5
	F05	SYBR		Unkn		79.5
	F06	SYBR		Unkn		79.5
	F07	SYBR		Unkn		None
	F08	SYBR		Unkn		None
	F09	SYBR		Unkn		None
	F10	SYBR		Unkn		None
	F11	SYBR		Unkn		None
	F12	SYBR		Unkn		None
	G01	SYBR		Unkn		None
	G02	SYBR		Unkn		None
	G03	SYBR		Unkn		None
	G04	SYBR		Unkn		None
	G05	SYBR		Unkn		None
	G06	SYBR		Unkn		None
	G07	SYBR		Unkn		None
	G08	SYBR		Unkn		None
	G09	SYBR		Unkn		None
	G10	SYBR		Unkn		None
	G11	SYBR		Unkn		None
	G12	SYBR		Unkn		None
	H01	SYBR		Unkn		None
	H02	SYBR		Unkn		None
	H03	SYBR		Unkn		None
	H04	SYBR		Unkn		None
	H05	SYBR		Unkn		None
	H06	SYBR		Unkn		None
	H07	SYBR		Unkn		None
	H08	SYBR		Unkn		None
	H09	SYBR		Unkn		None
	H10	SYBR		Unkn		None
	H11	SYBR		Unkn		None
	H12	SYBR		Unkn		None

## Sheet: Run Information
File Name	admin_2024-03-04 14-12-58_BR011103.pcrd
Created By User	admin
Notes
ID
Run Started	03/04/2024 06:13:12 UTC
Run Ended	03/04/2024 08:07:15 UTC
Sample Vol	10
Lid Temp	105
Protocol File Name	1.prcl
Plate Setup File Name	2.pltd
Base Serial Number	BR011103
Optical Head Serial Number	788BR10790
CFX Maestro Version	5.2.008.0222.
