# Supplementary material for: LncRNA H19 was a prognostic biomarker associated with immune infiltrates in stomach adenocarcinoma
Source: Research Square preprint supplement (doi:10.21203/rs.3.rs-4135393/v1), 2024-03-25
Supplement: Supplementary file 8 [file a0585f9719e4ca19b72d1828.xlsx]

## Sheet: SYBR
	Temperature	A1	A2	A3	A4	A5	A6	A7	A8	A9	A10	A11	A12	B1	B2	B3	B4	B5	B6	B7	B8	B9	B10	B11	B12	C1	C2	C3	C4	C5	C6	C7	C8	C9	C10	C11	C12	D1	D2	D3	D4	D5	D6	D7	D8	D9	D10	D11	D12
	65	16.8654	18.5492	17.174	17.8859	16.5146	18.5933	18.8049	17.1287	17.124	17.7625	16.8384	3.33227	16.9112	19.7379	18.4206	16.8578	16.6681	16.3131	16.6515	16.0571	16.0894	17.941	19.6029	21.0581	18.7684	19.251	18.7367	19.7657	18.7901	18.9362	19.9111	19.3698	18.7402	19.2885	17.8918	17.6147	18.4733	19.0553	20.5807	20.1127	18.3246	21.1077	19.0334	18.9665	18.6901	17.655	17.8389	17.5612
	65.5	36.5417	40.1898	37.2102	38.7528	35.7816	40.2855	40.7439	37.1121	37.102	38.4854	36.4831	7.21991	36.641	42.7654	39.9113	36.5252	36.1142	35.3451	36.0783	34.7903	34.8603	38.8722	42.473	45.6259	40.6649	41.7104	40.5961	42.8256	40.7118	41.0285	43.1408	41.9679	40.6038	41.7918	38.7655	38.1652	40.0254	41.2865	44.5915	43.5774	39.7033	45.7334	41.2391	41.094	40.4951	38.2524	38.651	38.0492
	66	33.7308	37.0983	34.3479	35.7718	33.0291	37.1866	37.6098	34.2573	34.248	35.5249	33.6767	6.66454	33.8225	39.4758	36.8412	33.7156	33.3362	32.6263	33.303	32.1142	32.1787	35.882	39.2058	42.1163	37.5368	38.5019	37.4733	39.5313	37.5802	37.8725	39.8223	38.7396	37.4805	38.577	35.7835	35.2294	36.9465	38.1106	41.1614	40.2253	36.6492	42.2155	38.0668	37.9329	37.3801	35.3099	35.6779	35.1224
	66.5	33.7308	37.0983	34.3479	35.7718	33.0291	37.1866	37.6098	34.2573	34.248	35.5249	33.6767	6.66454	33.8225	39.4758	36.8412	33.7156	33.3362	32.6263	33.303	32.1142	32.1787	35.882	39.2058	42.1163	37.5368	38.5019	37.4733	39.5313	37.5802	37.8725	39.8223	38.7396	37.4805	38.577	35.7835	35.2294	36.9465	38.1106	41.1614	40.2253	36.6492	42.2155	38.0668	37.9329	37.3801	35.3099	35.6779	35.1224
	67	33.7308	37.0983	34.3479	35.7718	33.0291	37.1866	37.6098	34.2573	34.248	35.5249	33.6767	6.66454	33.8225	39.4758	36.8412	33.7156	33.3362	32.6263	33.303	32.1142	32.1787	35.882	39.2058	42.1163	37.5368	38.5019	37.4733	39.5313	37.5802	37.8725	39.8223	38.7396	37.4805	38.577	35.7835	35.2294	36.9465	38.1106	41.1614	40.2253	36.6492	42.2155	38.0668	37.9329	37.3801	35.3099	35.6779	35.1224
	67.5	33.7449	37.1423	34.3087	35.7927	33.0172	37.1515	37.5843	34.2421	34.1834	35.4746	33.6738	6.67032	33.7641	39.5383	36.8854	33.7424	33.3167	32.5906	33.34	32.0453	32.1575	35.8025	39.2434	42.117	37.5637	38.5741	37.4557	39.5366	37.4466	37.8454	39.9075	38.8208	37.4368	38.6429	35.7455	35.237	36.9807	38.1771	41.2584	40.1673	36.6147	42.1993	38.1272	37.9386	37.3517	35.3433	35.6923	35.0234
	68	33.6423	36.8121	34.5288	35.6871	33.1192	37.3913	37.7645	34.2923	34.6349	35.8547	33.6364	6.62279	34.1742	39.1569	36.5079	33.5734	33.4134	32.8528	33.0467	32.4898	32.2677	36.3615	38.9658	41.9955	37.3811	38.0466	37.53	39.4932	38.2759	38.0417	39.2726	38.1624	37.7394	38.2281	35.9424	35.1862	36.7654	37.6502	40.5277	40.5428	36.8379	42.2982	37.7112	37.8971	37.4988	35.0662	35.5915	35.679
	68.5	33.6537	36.6599	35.2384	35.2999	33.1196	37.6825	37.8993	34.8215	35.0602	36.0462	34.0522	6.58877	34.638	38.3376	36.6993	33.35	33.8813	32.9896	33.0921	33.2899	32.7324	36.9345	38.8898	42.7488	37.1256	37.7252	38.0905	39.5119	40.0051	38.1672	38.9439	38.2086	38.1259	37.455	36.6562	35.104	36.377	37.6534	40.2543	41.2148	37.2485	42.5391	37.2968	37.8983	38.0812	35.2339	35.5182	36.6485
	69	33.0996	36.8605	35.194	34.7465	32.6893	37.6888	38.0391	35.001	35.1423	35.541	34.4588	6.98331	34.0858	37.9434	37.0583	32.6517	33.7916	33.0512	32.9336	33.0783	32.6555	36.5741	38.4254	43.8775	37.3088	37.8132	37.6707	39.5251	40.2246	38.2209	39.2401	38.9661	37.6485	37.0675	37.3041	35.1311	36.0979	37.9112	40.374	41.0346	37.0828	42.4063	36.9475	37.7167	38.3222	34.9079	35.3328	36.7113
	69.5	32.5132	37.0521	34.6867	34.5903	32.0913	37.4392	38.6984	34.683	35.7348	35.5173	34.7824	7.01587	33.9774	37.8952	36.894	31.5032	33.1836	33.1976	32.617	32.7664	32.5133	36.3837	37.7855	44.6875	37.7656	37.3366	37.6043	39.4371	39.8237	38.4262	39.6877	39.4695	37.5722	37.3712	37.8	35.401	36.1029	37.5512	40.2001	40.387	36.5932	42.432	36.589	37.6117	37.819	34.236	35.2468	36.4215
	70	32.7652	37.0302	34.438	34.1363	31.3087	36.8841	38.3945	34.768	35.705	35.3324	34.5404	6.42687	34.1078	37.6611	36.3554	30.7664	32.6716	32.9434	32.8862	32.657	31.9372	36.6299	37.5164	45.5088	37.8611	36.8421	37.8739	39.2603	39.8482	37.8969	39.8881	39.6652	37.5215	37.3	38.1896	35.2791	36.3397	37.5737	39.9662	39.6253	36.2154	42.4354	36.5004	37.2162	37.1379	33.8313	34.8058	36.1346
	70.5	33.2006	36.4712	34.2129	33.7404	30.9644	37.0121	37.7877	34.8444	34.8103	34.6924	34.3308	6.17654	34.0403	37.6537	36.325	30.4601	32.0915	32.4363	33.1856	31.7078	30.6569	36.9144	37.9005	46.7623	37.4641	36.8406	37.6795	39.1857	39.8867	37.3473	40.055	39.9373	36.6871	37.31	38.738	35.1314	36.4115	38.0593	39.6872	38.9403	35.839	41.86	36.4761	36.3714	36.4361	33.3536	34.2654	36.0255
	71	33.7156	36.1214	33.4889	34.0472	31.0818	37.1225	38.013	34.637	34.2531	34.7686	34.1401	6.32501	34.0684	37.8707	36.0348	29.7393	30.7375	31.1323	32.7449	30.6636	29.685	36.8434	38.3877	48.3726	37.127	36.2425	37.6423	39.1297	39.6513	37.2643	40.4535	39.8463	35.9938	38.3861	38.7327	35.2992	36.3302	38.1542	39.2396	38.4363	35.1476	41.027	36.1725	35.7436	35.0868	32.9506	33.921	35.4093
	71.5	34.3578	35.7562	33.0463	34.3834	31.2662	37.0421	37.7681	34.7615	34.0436	35.2483	33.6956	5.93195	33.7779	37.953	35.2565	28.6061	29.1888	29.5283	31.7432	30.1083	28.6973	36.6742	38.4635	50.4496	36.8346	35.6276	37.7316	39.3688	39.3586	37.3506	40.2096	39.2843	35.8001	38.7985	37.7297	35.1892	36.187	37.804	38.7342	37.5996	34.3803	39.9934	35.8317	34.9826	33.4626	32.6723	33.2321	34.214
	72	34.5983	35.3612	32.8794	34.3859	31.3113	37.7326	37.065	34.9073	33.5633	34.8708	32.9844	5.98233	33.5179	37.6416	35.0428	27.1616	28.083	27.691	30.6964	28.6451	27.1948	36.5479	38.3836	53.8479	36.1729	35.7536	37.5112	39.5991	39.1263	37.1493	39.5261	38.667	35.3772	38.1316	36.9555	34.7476	35.5176	37.1846	38.5704	36.8682	33.9467	39.0712	34.851	33.8908	32.0649	32.0218	31.9723	32.9787
	72.5	34.2263	35.2493	32.6092	34.4105	31.3241	37.8017	36.9707	34.6882	33.5254	34.7195	32.7227	6.57288	33.2749	37.4581	35.3172	25.7487	26.9369	25.8342	29.2169	26.5795	25.936	35.9494	37.965	60.6837	35.7222	35.5195	37.1281	39.5273	38.9478	36.9915	39.2901	38.1148	34.7859	37.7742	36.4471	34.4077	34.8017	36.6559	38.4385	36.3768	33.6851	38.1352	33.2327	32.7287	30.9157	31.2064	30.5594	31.7351
	73	33.5471	35.2903	32.3926	34.4298	31.348	36.6131	37.1445	34.4223	34.1009	35.1341	32.7048	6.83195	32.7587	37.0778	35.4447	25.0378	25.6239	24.7377	27.9279	25.5925	25.5882	34.9382	36.9897	77.359	35.9112	34.9639	36.9385	39.414	38.6913	37.0613	39.4487	37.9469	34.879	37.6708	35.3618	34.7272	34.525	36.2128	38.5126	35.6159	32.8878	37.3246	32.2886	31.8242	29.8823	30.6141	29.6459	30.1256
	73.5	32.837	35.043	32.3911	34.0296	30.8095	36.3045	37.0821	34.0919	34.3917	34.7587	32.298	6.94658	32.4385	36.4393	35.1369	25.2139	25.402	24.9786	27.629	25.3104	25.4699	34.3383	36.0947	111.239	35.6624	35.1893	36.1605	39.1992	38.2919	36.6884	39.0776	37.5066	34.9165	36.7175	34.7748	36.7406	34.1078	35.4846	38.5953	34.7627	32.3231	37.008	31.78	31.1878	29.5112	29.8461	29.1338	29.2901
	74	31.9346	34.3777	32.5741	33.6773	30.4922	35.9832	37.0885	33.6813	33.9626	33.6372	32.1107	7.30845	32.354	36.5348	35.2363	26.371	26.2465	25.9986	28.1674	25.3096	25.8658	34.1744	35.7543	161.01	35.1981	35.6106	35.6726	38.317	37.9233	35.8626	38.7667	37.1594	34.7156	36.0858	35.1659	40.6777	33.8963	35.332	38.6905	34.6701	32.8343	37.3858	31.5017	30.9844	30.5243	29.4243	29.1333	29.3802
	74.5	31.2989	33.9804	32.5959	33.4015	30.6621	34.4951	37.0215	33.3943	33.4811	33.5096	32.121	7.20594	32.2335	37.4322	35.5403	28.9767	27.9992	27.8243	29.7305	26.7378	27.5377	33.9871	35.4452	216.768	35.054	35.044	35.4267	37.4146	37.5007	35.1982	38.3971	36.6921	35.057	36.342	35.1591	45.4347	34.348	35.7517	38.662	35.2084	33.139	37.6633	32.269	31.5745	32.1082	30.1122	29.9165	30.0191
	75	31.2267	33.9648	32.5779	33.3224	30.5933	34.1495	36.8633	33.3257	33.0806	33.4218	32.1698	6.65727	32.6775	38.7624	35.7496	32.7956	31.1876	30.9733	33.1196	30.3616	30.786	34.3575	35.5069	266.568	34.7336	34.6668	35.1556	37.1347	37.1602	35.3463	37.9957	36.1558	35.2658	36.2937	34.8417	50.5689	34.4647	35.9346	38.7723	36.1362	33.4877	38.0491	34.205	33.1443	34.0367	32.3949	31.8101	32.1011
	75.5	31.2709	33.8018	32.6087	33.2827	30.1919	34.4573	36.2036	33.2333	32.4068	32.554	31.6081	6.39605	34.2782	41.6359	36.6359	37.4934	35.6652	35.0642	39.6096	36.9442	36.3942	35.6568	36.5457	294.522	34.2855	34.6015	35.1064	36.4052	37.0218	35.3614	37.2158	36.0909	34.939	35.6331	35.0643	55.0619	34.4526	36.5279	39.653	38.3327	35.6494	39.7809	36.2313	35.6372	36.8194	36.2774	35.2499	35.608
	76	31.1473	33.602	32.6189	33.2243	30.4739	33.8244	35.1113	33.0221	32.0313	32.5222	31.2869	5.9998	37.5028	50.1098	39.3795	46.4401	43.7499	42.0986	50.566	47.6838	46.1037	37.9068	38.4739	285.143	34.3386	33.7271	35.5078	35.6168	36.8035	35.5996	36.5655	36.5256	35.0905	35.1904	35.0381	56.6627	36.5233	38.3741	42.5281	42.2971	38.7967	43.2767	39.3922	39.5223	41.5158	42.9272	40.4745	40.9013
	76.5	31.2566	34.0584	32.301	33.0497	30.6138	33.6008	34.6015	32.6694	32.3785	33.2809	31.0709	5.84514	47.3227	68.8824	47.6196	65.6352	61.8406	58.3719	69.3362	66.0219	63.4626	45.228	45.232	239.964	34.1643	32.823	35.3423	35.6391	36.6804	36.227	36.4446	36.4278	35.1886	35.0592	34.2889	55.9582	43.5331	44.2478	51.6686	51.6006	45.7024	51.8756	48.0897	49.1016	51.969	57.4828	51.7172	52.2557
	77	31.3769	34.2437	32.0854	32.8037	30.1166	34.028	34.8072	32.39	32.8432	33.4034	31.0749	6.0523	68.0363	101.205	67.1407	97.8278	92.9894	87.558	100.441	96.5342	93.1972	63.9202	63.7727	177.034	33.8512	33.0165	35.0557	35.7986	36.8946	36.6345	36.5345	36.516	34.781	34.6449	33.8862	55.5979	59.8325	60.0494	72.3987	72.4237	63.6587	72.2918	68.3239	70.1804	75.4245	84.7202	75.625	75.6097
	77.5	30.9647	33.6202	31.917	32.1507	30.0257	33.9522	35.1834	32.0086	33.0438	33.3441	31.0437	6.13395	99.618	145.679	99.3797	142.61	137.009	129.372	144.351	139.574	135.384	95.2638	96.1161	113.418	33.8512	33.1825	35.0265	35.8871	36.7221	36.4944	36.6724	36.836	34.8358	34.3866	33.8431	57.9377	88.4561	88.4037	106.536	107.285	93.7081	107.375	102.323	105.274	114.264	123.95	113.069	112.034
	78	31.2856	33.7421	32.229	32.0288	30.2214	34.3487	36.0661	31.9537	33.3762	34.0405	31.5787	5.51422	140.003	195.672	142.414	196.24	191.92	181.744	193.873	187.88	183.318	137.263	140.228	61.1603	33.5954	33.5157	34.8688	36.6834	36.7787	36.7727	37.5614	36.567	35.4879	35.1755	33.7201	66.6198	127.774	127.966	152.383	153.958	133.5	154.236	148.598	152.431	165.431	171.81	160.069	159.069
	78.5	32.2566	35.0471	32.842	32.6999	29.9563	35.1006	37.8679	32.3444	33.5653	34.8447	32.6199	4.84221	182.788	237.718	190.412	244.748	244.277	232.819	238.221	230.91	226.892	185.302	191.589	28.5875	33.6209	35.0254	35.1192	37.8295	37.5252	37.4907	38.6959	36.5096	35.8594	36.2901	34.162	80.4572	171.301	175.049	203.111	206.197	179.787	206.75	201.331	205.259	221.402	219.808	209.817	209.285
	79	33.5489	36.461	34.2273	33.3944	29.8959	35.9302	39.8951	33.4832	33.608	35.8654	34.0927	3.90339	214.232	257.793	229.334	271.218	275.218	264.909	266.314	257.991	254.433	226.256	236.476	14.5023	34.9112	36.908	36.8989	39.1573	38.7345	38.4883	39.7512	37.7252	36.8636	37.0611	35.2926	94.8543	207.502	217.663	244.667	250.297	219.957	251.522	246.495	249.898	266.993	252.411	248.629	248.701
	79.5	35.5332	38.1029	36.0764	34.4003	30.3347	37.4754	41.2682	34.9946	33.7252	37.43	35.7186	2.35035	223.188	248.732	244.888	268.38	276.681	268.91	266.47	257.653	253.933	244.877	258.141	10.6484	37.098	38.6891	39.219	40.9056	40.4729	40.6045	41.2884	39.4408	38.5312	37.9896	36.3007	107.655	224.493	240.916	263.024	270.252	238.745	272.621	267.867	270.338	285.559	257.266	261.248	262.761
	80	38.0999	40.7	37.9584	35.9004	30.5986	38.798	42.3996	36.2361	34.1345	39.6584	37.6254	1.50841	207.752	212.421	233.224	235.558	248.017	243.519	235.3	226.599	223.182	236.075	250.98	9.89282	39.5746	40.8715	41.6975	42.9023	42.8069	43.0429	42.6474	40.8875	39.9284	39.211	37.3393	113.957	216.789	238.505	253.175	259.89	231.669	263.626	258.945	260.082	271.188	233.076	243.313	246.195
	80.5	39.973	43.431	39.4859	36.9073	31.2064	39.2478	43.4612	36.8899	34.8069	41.6794	39.8936	1.51072	170.944	159.389	197.12	179.351	193.134	192.332	182.262	174.578	172.178	202.889	217.019	8.6351	42.6719	42.9239	44.3184	45.1962	45.1452	45.114	43.6095	42.2149	40.8114	39.4243	38.3656	106.47	186.335	210.781	216.883	222.117	200.918	226.979	222.558	222.39	228.311	186.146	200.4	203.701
	81	40.981	45.1595	40.8029	37.0034	31.8044	39.5969	43.5332	36.9717	35.2144	43.0538	41.6537	1.33176	122.794	104.7	145.773	117.96	129.557	131.638	123.456	117.469	115.666	153.231	164.18	6.64213	45.5168	44.3219	46.7312	47.4645	47.1379	46.9415	44.446	43.1404	41.2968	39.22	38.615	89.2801	141.335	164.01	163.958	166.668	153.016	172.316	167.97	167.082	167.902	129.408	144.221	147.187
	81.5	42.0132	48.5804	42.1644	36.7531	31.7317	39.148	42.4041	36.2483	35.2689	43.5827	42.9046	1.00403	76.7548	59.813	94.0963	66.7766	75.4742	78.4197	71.4963	67.1792	65.983	100.311	107.949	5.4875	47.7904	45.2746	48.3427	49.1477	48.5056	48.5224	44.6638	42.7745	40.8606	39.0624	38.1206	69.3102	94.2347	111.956	109.09	108.882	101.871	115.333	110.341	109.091	106.888	77.7088	89.6294	91.6524
	82	47.6544	62.8293	47.9126	36.3579	31.7329	37.9497	41.6737	34.7784	35.3783	46.7104	47.3192	1.44786	41.7891	29.9156	53.206	30.6462	36.6149	39.1802	33.9788	31.4901	30.8566	56.9071	61.7429	4.46853	55.0581	49.1739	51.925	53.7471	51.1574	51.4259	44.5698	42.2088	39.9481	38.6029	37.7606	47.2045	55.537	67.5279	64.3644	61.7544	60.1188	68.8948	62.879	61.7856	58.4703	39.7346	47.3795	48.3334
	82.5	65.01	90.2531	66.3089	35.8328	31.7332	37.1978	41.3107	34.1523	35.4991	56.1492	56.5108	1.43425	19.6344	15.09	26.3646	10.7562	13.4817	15.5175	13.0065	12.3176	11.8844	28.0604	29.9618	2.92749	74.7563	65.2915	68.2772	63.7759	58.8727	59.9243	45.3828	42.684	39.7344	38.5272	37.5099	26.8732	29.5437	35.6633	34.0047	30.0717	31.951	37.5058	31.1984	30.093	27.3042	17.1171	21.0107	21.147
	83	93.3672	124.076	96.6356	36.0683	31.4607	37.0773	42.5202	35.7957	37.1844	70.0294	67.6859	0.825568	9.02982	10.062	12.5687	4.03894	4.69441	5.52488	5.3933	5.38585	4.48776	11.8659	12.7144	2.16387	106.073	95.6916	101.53	77.162	70.7983	73.5687	47.0873	44.5966	41.1276	41.7866	39.5029	13.6338	15.3339	17.5133	17.7352	13.2437	16.3014	21.0187	14.3183	12.7434	11.2655	7.11711	8.42794	7.94752
	83.5	126.798	159.689	131.624	40.9775	34.4002	40.5166	48.3634	41.5715	42.8901	86.8086	82.0954	0.674208	6.24135	9.77443	7.7341	2.66918	2.83077	2.38435	3.85101	4.05705	2.52256	4.92969	5.88295	2.14676	142.074	132.325	142.472	94.2611	86.0243	90.4612	52.4266	50.355	47.2483	49.5316	45.9904	6.09722	9.45775	10.132	11.4643	6.78069	10.4864	15.6811	7.3613	5.38793	5.49615	4.10775	4.07392	3.55897
	84	160.132	190.122	166.405	49.815	41.4782	49.3303	57.8246	50.3132	51.177	106.964	99.1549	0.537995	6.46081	11.1024	6.61891	2.2205	2.15096	1.02377	3.23601	3.77585	1.56918	3.47576	3.61337	1.81009	177.179	169.606	183.92	114.329	105.239	110.682	62.4075	60.4556	57.3554	59.4113	55.3432	1.43128	8.29802	8.12298	9.94451	5.08081	10.0608	15.4321	5.5259	3.10561	4.28616	3.23766	2.41568	2.46403
	84.5	181.838	197.525	190.688	58.9457	49.6568	59.5838	68.0609	61.0254	60.6568	122.009	109.131	-0.131634	6.87365	12.0208	6.84015	2.02136	1.71875	0.46962	2.95749	3.24099	0.927619	3.60905	3.23288	1.5948	199.244	198.877	218.863	128.358	121.499	127.67	72.9706	70.5581	67.3764	71.1183	66.2562	-0.476542	8.52879	8.25006	10.0474	5.84625	11.3021	17.2425	5.79616	2.44523	4.13748	3.50472	1.40356	2.04584
	85	177.785	176.385	187.809	68.6501	58.0543	69.458	79.666	73.3547	72.2881	123.027	108.644	-0.568718	7.65572	12.3556	7.65057	1.52797	1.17249	0.222852	3.11045	2.34812	0.551175	3.43514	3.1546	1.71225	193.761	201.586	226.046	130.552	126.464	132.719	82.221	79.5975	77.0217	85.0034	79.5328	-0.952609	8.84422	9.40053	10.2849	7.2738	12.7209	19.7468	5.937	2.11183	3.40583	4.19655	0.784342	2.05126
	85.5	150.818	140.092	159.769	80.9192	67.8131	80.6555	93.2704	87.226	85.4928	115.68	104.613	-0.536897	8.4506	12.2926	8.17427	0.824056	0.617635	0.43214	2.85445	1.47092	0.424625	3.70096	2.68857	1.69942	162.821	174.738	197.966	126.534	123.719	128.787	92.7838	89.5461	88.8373	101.144	94.9561	-0.863946	9.45487	10.4775	10.2696	7.84168	13.9507	21.7809	6.01866	2.08676	2.6884	4.28425	0.259146	2.08808
	86	114.581	99.0511	122.446	96.6736	81.3827	95.9524	107.704	103.364	100.23	107.251	98.7288	-0.550689	7.95492	10.4875	8.62325	0.440612	0.805653	0.739715	2.45981	0.918632	0.335389	4.02785	2.61394	1.7027	121.013	134.34	152.502	122.236	120.88	124.766	108.557	103.828	104.757	118.742	111.88	-0.275643	9.83097	10.974	9.67145	8.31783	14.4349	22.581	6.84084	2.27721	2.6518	4.27293	-0.120957	1.85291
	86.5	76.9138	60.1364	83.0431	114.459	97.8884	115.069	124.99	121.83	118.206	96.011	90.3249	-0.173769	6.5577	7.86905	8.84024	0.176582	0.713416	1.11202	2.51125	0.644302	0.381374	3.49173	2.67419	1.87917	78.3339	91.3119	103.585	117.124	116.819	119.954	128.308	121.941	123.559	135.877	128.327	-0.0650494	9.05154	10.7759	8.62083	8.67555	13.2009	21.8776	7.21462	2.62635	2.17605	4.23902	-0.111488	1.61352
	87	45.2788	33.523	48.306	131.653	113.763	134.397	142.921	139.147	135.618	85.0378	84.1846	0.432603	5.22926	5.69195	7.76435	-0.0426791	0.309073	1.49075	2.42086	0.117205	0.223875	2.56606	2.19544	1.78469	42.9745	52.9225	58.0482	112.738	112.466	114.525	148.401	140.488	142.731	148.815	140.605	-0.347063	7.60035	9.32585	6.77947	7.31022	10.7788	19.1326	6.76837	2.73739	1.42162	3.25366	0.299753	1.1923
	87.5	27.2709	22.0592	28.3529	146.442	128.108	152.194	156.015	151.165	147.32	80.283	82.0953	0.828583	3.69015	3.34399	5.94913	0.0530715	0.660523	1.43701	2.21076	0.1576	-0.273855	2.16617	2.02901	1.53381	22.5867	28.6368	27.4047	112.555	112.198	113.421	167.106	157.297	159.538	154.374	146.092	0.015854	6.0825	7.16557	4.92876	5.06987	7.55326	15.0705	6.27411	2.36728	1.28377	1.9048	0.803068	0.433775
	88	20.9997	17.9639	21.7209	152.465	137.442	165.374	159.184	153.169	149.4	77.2458	78.2246	0.488017	2.40053	1.58843	4.36759	0.25293	0.711035	1.3264	1.96282	0.690692	-0.396312	1.87409	1.97868	1.62384	15.2517	19.183	15.1942	111.167	112.119	113.195	178.841	167.183	166.738	145.804	139.577	0.203341	4.02609	4.79177	3.35538	3.35606	4.05861	10.9531	4.99708	1.83351	1.63492	1.06128	1.28055	0.33543
	88.5	17.9334	16.2459	18.1067	137.341	129.065	158.712	146.991	138.06	136.066	67.1205	66.8161	0.0269587	1.6817	1.1784	2.31652	0.477463	0.0655905	1.31426	1.47189	0.621817	-0.176703	1.36369	1.69127	1.50195	13.841	16.4607	11.8003	96.8074	100.182	101.058	167.637	155.842	151.638	120.249	117.308	-0.393916	1.92508	2.74083	1.77992	1.62124	1.38037	7.09253	3.24235	1.59242	1.67943	0.239418	1.74481	0.652674
	89	15.3151	15.9102	15.5505	106.292	103.368	129.048	119.303	109.009	108.317	52.9432	51.7306	-0.283708	1.35565	0.956206	0.500069	0.51636	0.164795	1.22369	0.741775	0.561975	0.204285	1.67603	1.93187	0.878226	13.6497	15.2201	10.7733	73.2847	77.5585	78.2227	134.306	123.96	118.853	88.0884	87.861	-0.559836	1.18853	1.25052	0.474328	-0.000818376	-0.00707644	3.89316	2.04885	1.01756	1.9249	-0.514946	2.08371	0.74778
	89.5	14.1986	15.6556	15.0528	73.8329	74.0639	93.5371	85.8889	76.5667	76.4169	40.5622	38.7853	-0.930525	1.38828	0.816998	-0.0551726	0.632062	0.694166	0.891073	0.268319	0.970762	0.992371	2.51188	2.42157	0.270252	13.0728	13.6483	10.8328	51.4646	54.8638	55.8682	96.4496	88.1819	83.8791	58.5255	61.0169	-0.19213	1.31774	0.710364	0.250135	-0.858192	-0.808362	1.90495	1.05749	0.409187	2.68834	-0.672452	1.97594	1.22852
	90	13.7176	14.5378	14.6325	43.3423	46.2098	60.0202	55.9696	47.1175	47.5906	29.5464	27.4323	-1.46519	1.30543	0.980389	-0.284099	0.761502	0.855241	0.629152	-0.433285	0.91	2.03267	2.40446	2.62434	0.151204	12.3227	12.0842	11.1223	32.1086	34.6071	35.9366	60.8532	54.5077	51.4348	34.2579	38.9493	-0.483678	1.12321	0.466927	0.055379	-0.702627	-0.345152	0.850818	0.377656	0.660998	3.33762	-0.129791	1.29726	1.72669
	90.5	13.7417	13.6353	13.9731	19.0757	22.7481	30.0527	32.7948	24.6226	25.0191	21.1978	18.8459	-1.00575	1.10485	0.817078	-0.394813	0.873358	1.26541	0.365487	-0.817104	0.69695	2.12151	1.95654	2.73029	-0.30982	12.1421	10.9072	11.1286	16.5295	17.6753	19.0157	30.5681	26.4474	25.218	19.7092	24.6806	-0.63024	1.28018	-0.0437264	-0.34122	-0.141417	1.02803	-0.0360167	0.712638	1.08697	3.08976	0.416662	0.588775	1.16908
	91	14.9984	13.0055	14.7579	8.5571	10.5254	13.046	20.2707	13.2615	13.0387	17.9001	16.5782	-0.834933	1.0076	0.33539	0.047223	0.966373	1.50169	0.410731	-0.419931	0.837582	1.84518	2.11251	2.59571	-0.92165	11.1217	9.94562	11.4777	10.2748	9.30822	10.4421	14.3935	11.6021	12.6872	16.9095	20.5264	-0.588996	2.07912	-0.581687	0.202599	0.241325	1.53489	-0.337964	1.176	1.02347	2.69856	0.889374	-0.049917	0.0965978
	91.5	16.1997	11.2789	15.42	8.68341	8.81047	10.8218	17.9144	10.7209	10.3475	17.4772	17.0279	-1.05669	1.03974	0.15132	0.0392932	1.19283	1.22918	0.293307	-0.251125	0.389691	1.40358	1.81752	1.87798	-1.05275	9.78721	9.07096	11.4539	10.726	9.09103	9.90222	12.2064	9.98027	11.4036	19.181	21.7582	-0.834232	1.80178	-0.65031	0.815451	0.634544	1.7688	0.0542104	1.24166	1.09144	2.47403	1.6081	-0.701883	-0.19714
	92	15.3014	8.46108	14.2866	10.8773	10.1416	12.7278	19.5148	11.1383	11.1387	16.6046	15.2321	-0.756525	0.682389	0.0575328	-0.489498	1.12029	0.90784	0.129344	-0.466858	-0.111203	0.562747	1.15772	1.02558	-0.689133	8.61959	8.16375	10.3054	10.8277	9.60537	9.96033	13.399	12.0568	12.1034	21.0885	22.8208	-0.952284	0.94472	-0.80857	0.676923	1.07636	2.0466	0.213471	1.52331	1.33341	1.7604	1.99129	-0.995239	-0.327144
	92.5	12.6948	6.13461	12.1428	12.5434	11.4455	14.3086	20.202	11.478	12.1407	14.5619	12.7431	-0.848028	0.236722	-0.122561	-0.596302	0.807095	0.782635	0.472286	-0.0105351	-0.0768224	0.0690027	0.984233	0.106624	-0.511472	6.48806	6.52409	7.8536	9.52444	8.70788	8.66671	13.9532	13.3729	12.2826	21.6011	22.8028	-1.37373	0.443119	-1.08608	0.659315	0.776575	1.32404	0.29104	1.54796	1.06525	1.11316	1.50403	-0.857795	-0.631138
	93	9.37491	4.28022	9.16875	13.1128	11.834	15.1722	20.2426	11.2861	13.2164	10.9753	10.1291	-1.28805	-0.398479	-0.259004	-1.04513	0.474012	0.548743	0.465442	0.201515	-0.179905	0.130867	0.972736	-0.424571	-0.143338	4.24608	4.64629	4.81891	7.40004	7.18881	7.33898	13.6309	13.6069	12.2959	20.6573	22.3951	-1.83461	-0.284117	-0.591837	0.50133	0.00926323	0.345366	0.583772	1.41842	0.89288	0.943271	1.09158	-1.06582	-0.4464
	93.5	5.29995	2.9197	5.90627	12.9968	11.5221	15.0419	19.417	10.5957	13.1116	7.30406	7.29871	-1.87218	-1.43215	-0.876096	-0.982911	-0.110141	0.821595	0.547299	0.293622	-0.238025	0.213734	0.280905	-0.912735	0.456219	2.62512	2.79119	1.5061	4.83452	5.27528	6.15145	13.3273	12.6143	12.3722	18.2555	21.0427	-2.7948	-1.29115	-0.0218211	-0.7734	-0.552166	0.413055	0.836505	0.86023	0.579233	0.853856	0.668336	-1.21217	-0.580108
	94	2.63277	2.14856	3.89305	12.7639	11.5801	14.8666	18.4125	10.0943	12.9703	5.14878	5.4033	-2.25138	-1.94892	-1.01673	-0.714319	-0.431947	1.20001	0.789927	0.6707	0.0447197	0.443795	-0.0604368	-1.20148	0.842412	1.44471	1.43714	-0.789395	2.91538	3.63132	4.84541	12.9161	11.9685	12.2877	16.5114	20.1071	-3.4327	-1.78283	0.17459	-1.374	-1.09719	0.0911219	0.691024	0.569439	0.402012	0.738669	0.0236335	-1.07549	-0.804012
	94.5	-0.896691	2.67567	1.73151	12.4884	11.8791	15.3721	17.8887	9.68885	12.4723	2.51754	5.10041	-3.8342	-3.29725	-2.56206	0.812406	-0.95165	2.01657	1.67079	1.89338	0.458167	0.75519	-0.980408	-1.83828	1.06248	-0.0625795	-0.111201	-3.92633	0.666822	1.97457	4.32863	13.6899	9.43419	13.0687	14.255	18.9438	-5.88348	-2.41807	0.462864	-3.13576	-1.90871	0.737022	1.19494	-0.594735	-0.463831	0.966626	-0.592665	-1.08925	-2.51427
	95	-1.81567	1.49034	-0.112899	5.23371	5.04632	6.73273	7.43571	3.89344	4.89018	0.0536428	2.20341	-2.37828	-1.98326	-1.90849	1.15922	-0.581608	1.27059	1.09094	1.35589	0.273788	0.303991	-0.90095	-1.1092	0.480436	-0.518046	-0.625267	-2.95755	-0.594822	0.288745	1.83465	6.3215	2.70019	5.90274	5.05965	7.44378	-3.7013	-1.38626	0.393621	-2.2849	-1.08716	0.866064	0.880977	-0.916699	-0.663477	0.52651	-0.410265	-0.39248	-1.93654
[truncated: 48 more columns]

## Sheet: Run Information
File Name	admin_2024-03-04 14-12-58_BR011103.pcrd
Created By User	admin
Notes
ID
Run Started	03/04/2024 06:13:12 UTC
Run Ended	03/04/2024 08:07:15 UTC
Sample Vol	10
Lid Temp	105
Protocol File Name	1.prcl
Plate Setup File Name	2.pltd
Base Serial Number	BR011103
Optical Head Serial Number	788BR10790
CFX Maestro Version	5.2.008.0222.
