# Supplementary material for: LncRNA H19 was a prognostic biomarker associated with immune infiltrates in stomach adenocarcinoma
Source: Research Square preprint supplement (doi:10.21203/rs.3.rs-4135393/v1), 2024-03-25
Supplement: Supplementary file 9 [file d5e2f454091c5e1544528f09.xlsx]

## Sheet: SYBR
	Temperature	A1	A2	A3	A4	A5	A6	A7	A8	A9	A10	A11	A12	B1	B2	B3	B4	B5	B6	B7	B8	B9	B10	B11	B12	C1	C2	C3	C4	C5	C6	C7	C8	C9	C10	C11	C12	D1	D2	D3	D4	D5	D6	D7	D8	D9	D10	D11	D12
	65	3786.74	3877.98	3833.82	3895.65	3780.6	3994.33	4082.59	3883.85	3867.31	3825.76	3796.28	2617.07	3718.94	3902.21	3839.01	3821.66	3869.53	3842.57	3900.81	3830.71	3795.2	3805.29	3904.1	3957.33	3844.32	3879.48	3952.97	4049.81	4007.18	4044.31	4118.29	4093.03	3982.04	3977.02	3927.03	3450.25	3754.17	3844.15	3972.5	3953.26	3833.97	4086.35	3956.3	3915.16	3981.73	3831.99	3835.42	3883.87
	65.5	3769.87	3859.43	3816.65	3877.76	3764.08	3975.74	4063.79	3866.73	3850.19	3808	3779.44	2613.74	3702.03	3882.47	3820.59	3804.8	3852.86	3826.26	3884.16	3814.65	3779.11	3787.35	3884.49	3936.27	3825.55	3860.23	3934.24	4030.04	3988.39	4025.37	4098.38	4073.66	3963.3	3957.73	3909.14	3432.63	3735.7	3825.09	3951.92	3933.14	3815.64	4065.25	3937.27	3896.19	3963.04	3814.33	3817.59	3866.31
	66	3753.01	3840.88	3799.47	3859.88	3747.57	3957.14	4044.98	3849.6	3833.06	3790.24	3762.6	2610.41	3685.12	3862.73	3802.17	3787.94	3836.2	3809.94	3867.51	3798.59	3763.02	3769.41	3864.89	3915.21	3806.79	3840.98	3915.5	4010.27	3969.6	4006.43	4078.47	4054.29	3944.56	3938.44	3891.25	3415.02	3717.23	3806.04	3931.34	3913.03	3797.32	4044.14	3918.24	3877.22	3944.35	3796.68	3799.75	3848.75
	66.5	3736.14	3822.33	3782.3	3841.99	3731.05	3938.55	4026.18	3832.47	3815.94	3772.48	3745.76	2607.08	3668.21	3842.99	3783.75	3771.08	3819.53	3793.63	3850.86	3782.54	3746.93	3751.47	3845.29	3894.16	3788.02	3821.72	3896.76	3990.51	3950.81	3987.5	4058.56	4034.92	3925.82	3919.15	3873.35	3397.4	3698.75	3786.98	3910.75	3892.92	3778.99	4023.03	3899.2	3858.26	3925.66	3779.02	3781.91	3831.19
	67	3719.27	3803.78	3765.13	3824.11	3714.54	3919.96	4007.37	3815.34	3798.82	3754.71	3728.92	2603.74	3651.3	3823.26	3765.33	3754.23	3802.86	3777.32	3834.2	3766.48	3730.84	3733.53	3825.69	3873.1	3769.25	3802.47	3878.03	3970.74	3932.02	3968.56	4038.65	4015.55	3907.08	3899.86	3855.46	3379.79	3680.28	3767.92	3890.17	3872.81	3760.67	4001.92	3880.17	3839.29	3906.97	3761.37	3764.07	3813.63
	67.5	3702.41	3785.23	3747.95	3806.22	3698.02	3901.36	3988.57	3798.21	3781.69	3736.95	3712.09	2600.41	3634.38	3803.52	3746.91	3737.37	3786.19	3761.01	3817.55	3750.42	3714.75	3715.59	3806.08	3852.04	3750.48	3783.22	3859.29	3950.98	3913.23	3949.63	4018.73	3996.18	3888.34	3880.58	3837.57	3362.17	3661.81	3748.87	3869.59	3852.69	3742.34	3980.81	3861.14	3820.32	3888.28	3743.71	3746.23	3796.06
	68	3685.54	3766.68	3730.78	3788.33	3681.51	3882.77	3969.76	3781.08	3764.57	3719.19	3695.25	2597.08	3617.47	3783.78	3728.49	3720.51	3769.52	3744.69	3800.9	3734.37	3698.66	3697.65	3786.48	3830.98	3731.71	3763.97	3840.55	3931.21	3894.44	3930.69	3998.82	3976.81	3869.6	3861.29	3819.68	3344.56	3643.33	3729.81	3849.01	3832.58	3724.02	3959.71	3842.1	3801.36	3869.59	3726.06	3728.39	3778.5
	68.5	3668.76	3748.4	3713.37	3770.57	3664.92	3863.97	3950.8	3763.86	3747.06	3701.12	3678.39	2593.78	3600.21	3764.42	3710.33	3703.81	3752.74	3728.17	3784.47	3717.9	3682.44	3679.23	3767.1	3809.93	3713.1	3745.15	3821.71	3911.48	3874.85	3911.59	3979.42	3957.93	3850.6	3842.39	3801.56	3326.99	3625.07	3711.16	3829.01	3812.12	3705.49	3938.5	3823.43	3782.42	3850.73	3708.6	3710.64	3760.35
	69	3651.96	3729.98	3695.63	3753.06	3648.45	3845.13	3931.86	3746.31	3729.54	3683.23	3661.19	2590.44	3582.96	3745.39	3691.77	3687.23	3735.72	3711.71	3767.83	3701.2	3666	3660.83	3747.64	3788.18	3694.53	3726.2	3802.57	3891.7	3854.62	3892.53	3959.79	3938.5	3831.58	3823.78	3783.02	3309.44	3606.94	3692.13	3808.71	3791.48	3686.85	3917.21	3804.8	3763.48	3831.55	3690.89	3692.89	3741.97
	69.5	3635.66	3711.54	3678.24	3735.78	3632.26	3826.32	3912.71	3728.92	3711.87	3665.54	3643.95	2586.85	3566.08	3726.43	3673.34	3671.22	3719.02	3695.11	3751.55	3684.84	3649.81	3642.64	3728.7	3766.08	3675.76	3707.41	3784	3871.97	3834.72	3873.36	3940.16	3918.98	3812.91	3805.24	3764.28	3291.83	3588.93	3673.31	3788.67	3771.16	3668.45	3896.08	3786.48	3744.71	3812.51	3673.74	3675.3	3723.7
	70	3619.34	3692.96	3660.92	3718.49	3616.38	3807.72	3893.28	3711.58	3693.9	3647.73	3626.48	2583.51	3548.95	3707.51	3654.92	3655.68	3702.53	3678.57	3735.14	3668.43	3633.55	3624.39	3709.8	3743.48	3656.81	3688.87	3764.93	3852.28	3814.76	3854.2	3920.13	3899.07	3794.01	3786.44	3745.24	3274.08	3570.81	3654.53	3768.52	3751.11	3650.25	3874.79	3768.18	3725.91	3793.77	3656.62	3657.69	3705.55
	70.5	3602.86	3674.58	3643.8	3701.63	3600.89	3789.35	3874.36	3694.16	3676.28	3630.25	3609.42	2580.38	3531.99	3688.73	3636.93	3640.4	3686.37	3662.22	3718.66	3652.29	3617.97	3606.01	3691.09	3720.51	3637.97	3670.51	3746.18	3832.69	3794.87	3835.47	3900.27	3879.32	3775.49	3767.92	3726.08	3256.56	3552.61	3635.68	3748.72	3731.53	3632.24	3853.73	3749.97	3707.55	3775.39	3639.91	3640.51	3687.55
	71	3586.12	3656.47	3626.77	3684.66	3585.35	3770.7	3855.4	3676.77	3659.05	3612.95	3592.15	2577.28	3514.9	3669.83	3618.63	3625.27	3670.54	3646.25	3702.06	3636.74	3602.87	3587.52	3671.88	3696.66	3619.35	3652.1	3727.24	3813.08	3774.9	3816.79	3880.06	3859.19	3757.31	3749.01	3706.59	3238.92	3534.42	3616.52	3728.86	3712.15	3614.45	3832.98	3731.74	3689.52	3757.42	3623.26	3623.4	3669.6
	71.5	3569.13	3638.45	3610.28	3667.58	3569.8	3752.24	3836.4	3659.48	3641.98	3595.43	3575.31	2574.11	3497.96	3650.88	3600.95	3610.73	3655.66	3631.15	3686.01	3621.59	3588.29	3569.18	3652.76	3672.04	3600.84	3634.27	3708.53	3793.53	3755.23	3798.18	3859.91	3839.54	3739.43	3729.62	3687.48	3221.3	3516.3	3597.6	3709.48	3693.13	3597.1	3812.73	3713.82	3671.83	3740.34	3606.95	3606.64	3652.22
	72	3551.82	3620.71	3593.69	3650.32	3554.1	3733.58	3817.68	3642	3625.03	3577.8	3558.49	2571.29	3481.13	3631.92	3583.3	3596.71	3641.3	3616.76	3670.34	3606.75	3574.23	3550.85	3633.45	3645.95	3582.56	3616.38	3689.54	3773.71	3735.54	3779.47	3839.91	3819.92	3721.53	3710.35	3668.84	3203.77	3498.3	3578.76	3690.08	3674.54	3580.03	3792.97	3696	3654.59	3723.93	3590.63	3590.25	3635.4
	72.5	3534.63	3603.06	3577.41	3633.19	3538.49	3714.6	3799.26	3624.62	3608.35	3560.54	3542.27	2568.06	3464.45	3613.23	3565.84	3583.55	3627.58	3603.45	3655.36	3593.01	3561.06	3532.7	3614.43	3617.52	3564.64	3598.55	3671.04	3753.97	3716.09	3761.03	3820.33	3800.86	3704.07	3691.46	3650.5	3186.53	3480.79	3560.4	3670.9	3656.23	3563.14	3773.66	3679.05	3637.95	3708.24	3574.96	3574.69	3619.25
	73	3517.65	3585.45	3561.07	3615.92	3522.78	3695.93	3780.67	3607.33	3591.42	3543.02	3525.74	2564.75	3447.88	3594.49	3548	3570.85	3614.37	3590.8	3641.09	3580.03	3548.17	3514.95	3595.56	3583.62	3546.76	3580.89	3652.4	3734.2	3696.6	3742.46	3800.57	3781.76	3686.66	3672.55	3632.45	3169.25	3463.45	3542.1	3651.61	3638.2	3546.4	3754.81	3662.68	3621.82	3692.98	3559.4	3559.62	3603.7
	73.5	3501.09	3567.81	3544.99	3598.82	3507.21	3677.89	3762.14	3590.21	3574.29	3525.51	3509.61	2561.25	3431.67	3576.18	3530.45	3558.37	3601.8	3578.51	3627.29	3567.31	3535.41	3497.71	3577.43	3537.5	3528.77	3563.49	3634.17	3714.58	3677.42	3724.03	3780.94	3762.94	3669.19	3653.89	3615.06	3151.54	3446.27	3524.22	3632.38	3620.62	3530.21	3736.25	3646.69	3606.07	3678.24	3544.35	3544.97	3589.02
	74	3484.83	3550.46	3528.65	3581.89	3491.94	3659.64	3743.59	3573.24	3557.13	3508.35	3493.41	2557.79	3415.41	3557.95	3512.81	3545.47	3588.79	3565.68	3613.31	3554.64	3522.6	3480.55	3559.39	3469.94	3511.12	3545.68	3616.21	3695.09	3658.31	3705.83	3761.5	3744.25	3651.77	3635.79	3597.55	3132.21	3429.3	3506.53	3613.01	3603.33	3513.94	3717.71	3630.84	3590.56	3663.27	3529.49	3530.4	3574.27
	74.5	3469.12	3533.39	3512.43	3565.13	3476.66	3642.04	3725.07	3556.51	3540.34	3491.76	3477.47	2554	3399.3	3539.52	3495.18	3531.77	3575.39	3552.36	3598.93	3541.76	3509.34	3463.52	3541.65	3375.58	3493.54	3528	3598.46	3676.27	3639.5	3688.14	3742.18	3725.8	3634.41	3617.69	3579.94	3110.71	3412.29	3488.8	3593.7	3585.84	3497.38	3698.86	3615.03	3574.96	3647.61	3514.75	3515.71	3559.52
	75	3453.45	3516.42	3496.06	3548.46	3461.31	3625	3706.59	3539.82	3523.64	3474.83	3461.29	2550.64	3383.08	3520.4	3477.26	3516.28	3560.56	3537.65	3583.26	3527.53	3494.79	3446.47	3523.88	3254.25	3476.09	3510.63	3580.78	3657.6	3620.8	3670.53	3723.11	3707.56	3616.73	3599.49	3562.43	3086.73	3394.98	3470.79	3574.32	3568.03	3480.76	3680	3598.4	3558.82	3631.09	3499.12	3500.3	3544.02
	75.5	3437.87	3499.44	3479.85	3531.8	3446.1	3607.81	3688.27	3523.19	3507.29	3458.42	3445.37	2547.32	3366.42	3500.43	3459.3	3498.74	3543.92	3521.18	3565.29	3510.89	3478.14	3429	3505.99	3112.6	3458.82	3493.31	3563.27	3639.18	3602.32	3652.79	3704.23	3689.58	3599.21	3581.47	3545.04	3060.27	3377.8	3452.79	3554.78	3549.49	3463.63	3660.59	3580.76	3541.64	3613.41	3482.05	3483.63	3527.16
	76	3422.2	3482.62	3463.46	3515.18	3431.04	3590.65	3670.44	3506.61	3491.19	3442.17	3429.66	2544.25	3348.44	3477.82	3440.26	3478.02	3524.21	3502	3542.87	3489.84	3457.67	3410.57	3487.09	2965.54	3441.74	3476.12	3545.62	3621.2	3583.78	3635.13	3685.87	3671.4	3581.74	3563.83	3527.4	3032.09	3360.16	3434	3534.26	3529.33	3444.87	3639.86	3561.9	3522.87	3593.88	3462.3	3464.66	3508.03
	76.5	3406.69	3465.76	3447.27	3498.59	3415.65	3573.93	3653.08	3490.18	3475.16	3425.79	3414.07	2541.28	3327.83	3448.65	3418.96	3450.67	3498.58	3477.59	3513.4	3461.92	3430.74	3390.21	3466.65	2833.03	3424.5	3459.58	3527.83	3603.46	3565.5	3617.15	3667.59	3653.11	3564.13	3546.25	3510.09	3003.94	3340.42	3413.68	3511.19	3506.25	3424.12	3616.4	3540.41	3501.14	3570.87	3437.82	3442.11	3485.22
	77	3390.94	3448.6	3431.15	3482.15	3400.5	3556.96	3635.73	3473.93	3458.79	3408.96	3398.56	2538.36	3299.4	3406.8	3390.86	3410.31	3460.28	3441.58	3471.58	3421.9	3392.26	3363.56	3440.01	2728.52	3407.59	3443.16	3510.3	3585.53	3547.06	3598.93	3649.39	3634.96	3546.61	3528.8	3493.07	2976.07	3315.12	3388.17	3480.75	3475.9	3397.45	3586.1	3511.97	3471.93	3539.86	3402.83	3410.96	3453.88
	77.5	3375.37	3431.61	3415.17	3465.83	3385.48	3539.95	3618.23	3457.8	3442.35	3392.41	3382.98	2535.25	3258.05	3345.56	3349.8	3350.85	3403.52	3388.01	3411.01	3363.49	3335.64	3324.27	3400.68	2656.23	3390.62	3426.54	3492.74	3567.65	3528.64	3580.58	3631.03	3616.57	3529.28	3511.57	3476.15	2947.88	3278.65	3351.64	3436.65	3431.61	3358.54	3541.81	3469.9	3428.74	3493.03	3351.19	3364.36	3407.54
	78	3359.88	3414.87	3399.16	3449.92	3370.44	3522.95	3600.46	3441.87	3425.73	3375.52	3367.43	2532.32	3198.43	3260.36	3289.8	3266.46	3321.72	3310.68	3326.39	3281.54	3256.02	3266.61	3342.02	2613.34	3373.76	3409.93	3475.27	3549.54	3510.3	3562.39	3612.62	3598.19	3511.69	3494.27	3459.22	2917.18	3225.01	3297.99	3372.4	3366.76	3302.18	3476.87	3407.73	3364.77	3423.67	3277.58	3296.39	3340.22
	78.5	3343.98	3397.7	3382.88	3433.69	3355.31	3505.55	3582.04	3425.77	3408.99	3358.34	3351.32	2529.76	3117.81	3151.22	3206.74	3155.53	3212.14	3206.61	3218.02	3176.5	3153.09	3186.2	3259.46	2592.02	3356.97	3392.86	3457.8	3530.91	3491.76	3543.73	3593.43	3579.96	3493.81	3476.34	3442.35	2880.48	3150.3	3222.61	3283.62	3276.9	3224.17	3386.8	3320.41	3275.54	3326.97	3179.51	3203.99	3248.09
	79	3327.56	3379.79	3366.21	3417.2	3340.45	3487.82	3562.56	3409.42	3392.19	3340.63	3334.74	2527.52	3017.47	3026.13	3100.89	3025.17	3080.77	3080.83	3090.87	3053.28	3031.78	3082.52	3151.57	2581.84	3339.96	3374.84	3439.94	3511.68	3472.69	3524.83	3573.92	3561.5	3475.74	3458.01	3424.97	2836.6	3054.93	3123.74	3170.81	3161.96	3123.46	3271.46	3207.7	3160.92	3204.02	3060.25	3088.42	3132.73
	79.5	3310.33	3361.19	3348.58	3400.25	3325.35	3469.53	3542.22	3392.23	3375.37	3322.39	3317.2	2525.93	2907.11	2898.05	2981.06	2889	2941.64	2946.17	2956.15	2922.87	2903.09	2963.43	3026.6	2575.8	3321.91	3355.96	3420.8	3491.69	3452.94	3505.09	3553.62	3542.15	3456.86	3439.26	3407.06	2785.95	2945.84	3007.98	3042.61	3030.4	3007.53	3139	3077.66	3029.45	3064.23	2931.46	2959.47	3003.39
	80	3291.95	3341.55	3330.12	3382.74	3310.13	3450.38	3521.34	3374.46	3358.42	3303.11	3298.98	2525.08	2798.2	2781.72	2860.35	2761.58	2808.96	2816.66	2829.31	2800.43	2782.59	2842	2898.02	2570.59	3302.8	3336.1	3400.69	3470.73	3432.13	3484.17	3532.65	3522.09	3437.24	3420	3388.66	2730.05	2834.36	2886.92	2912.29	2896.52	2888.84	3003.62	2944.64	2895.44	2923.68	2807.62	2832.01	2874.82
	80.5	3272.32	3320.47	3310.67	3364.42	3294.71	3430.85	3499.86	3356.08	3341.2	3282.76	3279.53	2524.3	2702.74	2688.3	2751.74	2657.08	2697.68	2706.67	2724.32	2699.61	2683.15	2731.27	2779.92	2565.9	3282.25	3315.1	3379.09	3448.74	3410.13	3462.09	3511.03	3501.29	3417.01	3400.18	3369.73	2674.05	2732.68	2773.53	2793.64	2774.89	2779.67	2879.79	2823.11	2773.76	2797.61	2702	2720.15	2761.33
	81	3252.09	3298.2	3290.66	3345.96	3278.93	3411.17	3478.02	3337.67	3323.65	3261.53	3259.15	2523.58	2629.07	2622.69	2665.64	2583.15	2617.25	2625.89	2648.07	2626.78	2611.37	2641.73	2683.97	2562.03	3260.14	3293.26	3356.4	3425.53	3387.04	3439.1	3489.07	3479.95	3396.51	3380.65	3350.41	2625.13	2650.35	2679.14	2698.06	2677.22	2690.62	2779.5	2724.98	2675.86	2698.15	2623.06	2633.74	2673.38
	81.5	3231.25	3274.9	3269.76	3327.47	3262.99	3391.37	3456.49	3319.24	3306.03	3239.76	3237.88	2522.98	2579.7	2582.13	2606.11	2537.66	2566.82	2574.01	2599.86	2581.12	2566.47	2578.6	2616.35	2559.16	3236.7	3270.77	3332.4	3401.29	3363.04	3415.15	3466.67	3458.33	3375.84	3360.96	3331.23	2585.34	2591.74	2610.42	2630.07	2608.67	2627.23	2707.92	2655.69	2607.16	2629.89	2571.9	2575.76	2614.07
	82	3209.26	3247.96	3247.69	3309.23	3247.2	3372.13	3435.58	3301.51	3288.37	3217.51	3215.76	2522.49	2550.64	2560.52	2569.94	2513.98	2539.39	2545.28	2574.32	2557.32	2543.13	2540.02	2574.56	2556.52	3211.49	3247.39	3307.57	3375.92	3338.29	3390.3	3444.44	3437.2	3355.71	3341.61	3312.28	2556.12	2554.86	2566.1	2587.47	2566.76	2587.38	2662.61	2613.13	2565.19	2589.38	2543.25	2542.24	2579.87
	82.5	3181.82	3210.08	3219.94	3291.11	3231.26	3353.35	3414.73	3284.32	3270.62	3192.12	3189.86	2521.59	2535.87	2549.83	2550.68	2504.43	2527.66	2532.34	2563.26	2547.03	2533.07	2519.44	2552.33	2554.75	3179.76	3219.73	3278.5	3346.73	3311.14	3362.89	3421.96	3415.96	3335.78	3322.25	3293.4	2537.83	2534.22	2540.91	2563.44	2544.49	2564.99	2636.65	2590.35	2542.94	2568.72	2529.73	2525.89	2563.2
	83	3142.55	3156.63	3179.55	3273.22	3215.44	3334.77	3393.98	3266.98	3252.6	3160.63	3158.85	2521.13	2529.15	2543.8	2541.48	2501.14	2523.65	2527.6	2559.18	2543.03	2529.36	2509.9	2542.29	2553.49	3134.95	3179.94	3236.77	3311.55	3278.72	3329.56	3398.86	3394.24	3315.67	3302.57	3274.4	2528.2	2523.43	2528.25	2551.22	2534.31	2553.4	2622.71	2579.56	2532.8	2559.63	2524.1	2519.02	2556.48
	83.5	3087.62	3085.78	3122.51	3254.36	3199.31	3315.72	3371.52	3247.9	3232.84	3121.59	3121.69	2520.72	2525.56	2538.93	2536.65	2499.43	2521.78	2525.64	2556.81	2540.66	2527.64	2506.05	2537.92	2552.48	3072.91	3122.99	3175.69	3268.99	3239.78	3288.76	3374.31	3370.77	3293.94	3279.79	3253.23	2523.28	2517.51	2521.66	2544.07	2529.55	2547.09	2613.83	2574.39	2528.55	2555.77	2521.43	2516.09	2553.8
	84	3015.91	2998.01	3048.09	3231.65	3180.43	3293.48	3345.05	3224.92	3209.28	3073.44	3076.49	2520.45	2522.36	2533.72	2533.07	2498.23	2520.52	2524.82	2555.07	2538.72	2526.58	2504.06	2535.58	2551.37	2993.16	3047.59	3094.24	3216.96	3192.19	3238.69	3345.77	3343.26	3267.83	3252.64	3227.93	2521.58	2513.17	2517.18	2538.92	2526.67	2541.99	2606.12	2571.31	2526.53	2553.33	2519.55	2514.42	2552.3
	84.5	2929.45	2899.21	2957.95	3204.42	3157.61	3266.11	3313.5	3197.24	3181.42	3015.47	3023.57	2520.24	2519	2527.86	2529.76	2497.15	2519.56	2524.46	2553.5	2536.89	2525.99	2502.26	2533.96	2550.65	2897.93	2954.89	2993.11	3155.59	3135.05	3178.65	3311.76	3310.25	3236.53	3220.06	3197.59	2521.41	2508.93	2513.13	2533.81	2524.03	2536.7	2598.01	2568.48	2525.12	2551.25	2517.98	2513.52	2551.16
	85	2837.98	2804.81	2861.51	3172.57	3130.69	3233.88	3276.76	3163.61	3148.29	2953.46	2968.89	2520.56	2515.43	2521.79	2526.12	2496.24	2518.8	2524.29	2552.06	2535.52	2525.61	2500.44	2532.27	2549.73	2798.13	2852.79	2879.68	3090.32	3072.32	3112.75	3272.91	3272.81	3200.45	3181.17	3161.29	2521.81	2504.59	2508.75	2528.82	2520.7	2530.63	2588.75	2565.48	2523.99	2549.23	2515.98	2512.94	2550.18
	85.5	2755.22	2725.37	2774.01	3135.37	3099.31	3196.4	3233.53	3123.61	3108.86	2893.79	2915.61	2520.75	2511.36	2515.59	2522.14	2495.65	2518.38	2524.17	2550.43	2534.54	2525.4	2498.77	2530.84	2548.95	2708.11	2757.79	2772.38	3026.05	3009.77	3047.29	3229.3	3230.47	3159.15	3134.7	3117.71	2522.25	2500.05	2503.73	2523.56	2516.86	2524.01	2578.33	2562.54	2522.96	2547.84	2513.86	2512.71	2549.1
	86	2688.8	2665.58	2703.43	3091.12	3062.31	3152.61	3183.3	3076.03	3062.52	2838.13	2864.63	2521.08	2507.16	2509.74	2517.97	2495.37	2518.09	2523.83	2549.22	2534.01	2525.17	2496.74	2529.54	2548.03	2637.18	2680.37	2684.64	2963.96	2948.78	2984.16	3179.37	3182.63	3111	3079.81	3066.12	2522.6	2495.18	2498.36	2518.63	2512.89	2516.81	2567.17	2559.38	2521.87	2546.47	2511.72	2512.65	2548.13
	86.5	2640.9	2625.93	2651.94	3038.39	3017.5	3099.89	3125.44	3019.94	3008.21	2786.92	2817.2	2521.24	2503.54	2505.23	2513.57	2495.19	2517.6	2523.42	2547.92	2533.59	2525.05	2494.85	2528.21	2547.23	2587.29	2623.97	2620.59	2903.92	2889.07	2922.65	3120.14	3126.07	3053.96	3016.08	3005.95	2522.57	2490.38	2492.87	2513.97	2508.59	2509.83	2556	2555.76	2520.66	2545.24	2509.61	2512.77	2547.26
	87	2610.91	2603.57	2619.58	2976.76	2964.49	3037.48	3058.28	2954.42	2944.45	2742.03	2774	2521.23	2500.61	2501.84	2509.31	2495.18	2517.41	2522.73	2546.72	2533.38	2524.82	2493.3	2526.92	2546.19	2557.68	2588.28	2580.44	2846.7	2831.96	2864.23	3050.99	3060.61	2987.4	2944.64	2938.48	2522.72	2486.24	2487.77	2510.12	2504.45	2503.81	2545.6	2552.28	2519.28	2544.32	2507.61	2512.71	2546.54
	87.5	2593.57	2590.12	2601.43	2907.24	2904.06	2965.8	2983.33	2881.7	2873.52	2701.07	2732.51	2520.84	2498.34	2499.54	2505.92	2495.19	2517.2	2521.99	2545.52	2533.39	2524.87	2492.23	2525.98	2545.46	2542.04	2568.91	2560.26	2790.68	2776.11	2807.6	2972.07	2985.96	2911.73	2868.56	2866.52	2522.85	2482.81	2483.66	2507.2	2501.41	2499.18	2537.08	2549.02	2517.99	2543.74	2506.41	2512.45	2546.1
	88	2581.83	2580.25	2589.2	2831.87	2837.38	2886.28	2903.91	2804.95	2798.75	2661.55	2692.19	2520.5	2496.88	2498.4	2503.35	2495.11	2516.79	2521.3	2544.52	2533.16	2525.05	2491.12	2524.88	2544.62	2533.04	2557.37	2550.26	2734.46	2719.89	2750.85	2885.23	2904.62	2829.54	2792.51	2794.33	2522.73	2480.23	2480.64	2505.16	2499.33	2496.29	2530.56	2546.11	2516.94	2542.97	2505.64	2511.9	2546.02
	88.5	2571.93	2571.67	2579.05	2757.92	2769.28	2803.46	2826.56	2731.15	2726.53	2624.76	2655.33	2520.38	2495.85	2497.77	2501.6	2494.93	2516.57	2520.65	2543.59	2532.77	2525.21	2490.36	2524.02	2543.87	2525.76	2548.56	2543.55	2681.35	2665.68	2696.09	2796.68	2821.98	2748.32	2725.29	2729.3	2522.74	2478.78	2478.82	2503.83	2498.05	2495	2526.08	2544.09	2516.13	2542.13	2505.33	2511.18	2545.7
	89	2563.73	2563.76	2570.84	2696.97	2710.91	2730.96	2759.27	2669.04	2664.88	2595.03	2625.94	2520.46	2495.13	2497.17	2500.99	2494.66	2516.63	2520	2543.08	2532.54	2525.19	2489.65	2523.12	2543.18	2518.92	2540.58	2537.95	2639.02	2621.27	2651.35	2720.9	2751.85	2680.6	2673.37	2678.18	2523.08	2478.12	2477.81	2503.33	2497.68	2494.72	2523.36	2542.8	2515.38	2541.26	2505.38	2510.18	2545.38
	89.5	2556.39	2555.73	2563.2	2652.07	2666.66	2675.54	2708.22	2622.77	2618.95	2571.63	2603.37	2520.7	2494.44	2496.79	2500.93	2494.41	2516.35	2519.46	2542.82	2532.16	2524.95	2488.62	2522.05	2542.99	2512.13	2533.34	2532.57	2607.97	2588.28	2617.96	2663.32	2698.85	2630.03	2636.91	2641.16	2523.24	2477.46	2477.44	2503.21	2497.93	2494.89	2522	2542	2515.1	2540.14	2505.76	2509.16	2544.91
	90	2549.42	2548.21	2555.74	2622.81	2636.66	2637.23	2672.93	2592.03	2588.04	2554.21	2586.86	2521.36	2493.75	2496.32	2500.98	2494.02	2515.97	2519.1	2542.83	2531.62	2524.17	2487.25	2520.73	2542.85	2505.87	2526.92	2527.06	2587.15	2566.05	2595.12	2624.17	2663.39	2596.34	2613.95	2616.37	2523.34	2476.82	2477.05	2503.06	2498.39	2495.34	2521.3	2541.68	2514.86	2538.59	2505.95	2508.29	2544.17
	90.5	2542.57	2541.18	2548.57	2607.65	2619.67	2614.8	2651.14	2574.52	2570.32	2541.63	2575.44	2522.05	2493.15	2495.85	2501.18	2493.65	2515.47	2518.82	2543.2	2531.27	2523.04	2486.27	2519.45	2542.88	2499.75	2521.2	2521.48	2575.17	2553.05	2581.44	2601.5	2643.35	2577.51	2601.1	2600.95	2523.71	2476.28	2477	2503.17	2498.56	2495.11	2521.1	2541.49	2514.41	2536.92	2505.88	2507.88	2543.33
	91	2535.51	2534.56	2541.59	2601.68	2612.21	2605.19	2638.47	2565.7	2561.39	2532.27	2567.11	2522.4	2492.64	2495.54	2501.31	2493.15	2514.74	2518.7	2543.55	2530.89	2522.12	2485.23	2518.04	2543.18	2493.83	2515.98	2515.9	2569.24	2547.07	2574.84	2591.45	2634.91	2569.06	2592.47	2590.16	2523.95	2475.47	2477.09	2503.28	2498.54	2494.41	2521.25	2540.94	2513.83	2535.53	2505.54	2507.69	2543.07
	91.5	2527.6	2528.33	2533.84	2597.45	2607.54	2599.56	2629.3	2559.87	2555.84	2523.28	2558.44	2522.93	2492.13	2495.48	2501.19	2492.67	2514.04	2518.43	2543.65	2530.5	2521.23	2484.21	2516.94	2543.73	2488.68	2511.24	2510.06	2563.87	2542.53	2569.81	2585	2629.76	2563.11	2583.33	2579.55	2524.33	2474.34	2477.52	2502.95	2498.32	2493.62	2521.34	2540.35	2513.38	2534.21	2504.96	2507.92	2543.14
	92	2519.61	2523.43	2526.42	2592.53	2602.81	2593.57	2619.87	2554.43	2550.41	2514.82	2550.33	2523.4	2491.65	2495.37	2501.34	2492	2513.52	2518.41	2543.84	2530.51	2520.76	2483.46	2516.19	2544.16	2484.04	2506.92	2504.62	2558.45	2537.76	2564.73	2578.56	2624.22	2557.2	2573.25	2568.33	2524.78	2473.75	2477.75	2502.56	2497.91	2492.66	2521.21	2539.68	2512.73	2533.12	2503.99	2508.34	2543.23
	92.5	2512.56	2519.81	2519.72	2586.6	2597.34	2586.79	2609.83	2548.69	2544.6	2506.85	2543.33	2523.73	2491.47	2495.44	2501.64	2491.58	2513.11	2518.24	2544.04	2530.55	2520.62	2482.99	2515.92	2544.43	2480.18	2503.18	2499.95	2553.23	2533.09	2560	2571.61	2617.73	2551.01	2562.44	2556.86	2525.32	2473.37	2478.33	2502.28	2497.35	2491.71	2521.14	2538.86	2512.11	2532.44	2503.09	2508.86	2543.48
	93	2507.05	2517.22	2514.41	2580.14	2591.49	2579.37	2599.77	2543.02	2538.27	2500.47	2537.62	2524.3	2491.44	2495.5	2501.96	2491.2	2512.74	2517.97	2543.87	2530.6	2520.61	2482.46	2516.04	2544.65	2477.57	2500.44	2496.87	2549.06	2529.16	2556.08	2564.72	2611.01	2544.94	2551.88	2545.61	2526.17	2473.33	2478.73	2501.93	2497.21	2491.36	2520.9	2538.17	2511.66	2531.94	2502.49	2509.24	2543.81
	93.5	2503.28	2515.45	2510.59	2573.59	2585.61	2571.76	2589.71	2537.47	2531.53	2495.89	2533.21	2525.04	2491.92	2495.75	2502.62	2491.14	2512.49	2517.76	2543.85	2530.72	2520.48	2482.1	2516.33	2544.55	2475.85	2498.52	2495.17	2545.89	2525.96	2552.64	2557.99	2604.3	2538.71	2541.99	2534.59	2527.22	2473.68	2478.91	2501.91	2497.32	2491.24	2520.56	2537.5	2511.23	2531.48	2502	2509.92	2543.96
	94	2501.59	2514.19	2508.35	2567.19	2579.94	2564.35	2580.4	2532.42	2525.2	2492.98	2530.18	2526.16	2492.82	2496.34	2502.9	2491.28	2511.89	2517.4	2543.54	2530.79	2520.38	2482.15	2516.93	2544.22	2474.89	2497.59	2495.24	2544.15	2523.85	2549.94	2551.41	2598.41	2532.59	2533.59	2524.55	2528.95	2474.56	2478.8	2502.65	2497.76	2490.97	2520.1	2537.29	2511.07	2531.09	2501.85	2510.41	2544.43
	94.5	2500.69	2513.15	2506.69	2560.95	2574.11	2556.95	2571.4	2527.45	2518.72	2490.77	2527.63	2527.39	2493.92	2496.9	2503.19	2491.58	2511.26	2516.91	2543.09	2530.66	2520.03	2482.21	2517.55	2543.74	2474.42	2497.08	2495.98	2542.99	2522.33	2547.73	2545.06	2592.63	2526.45	2525.64	2514.67	2530.8	2475.45	2478.73	2503.38	2498.43	2491.03	2519.81	2537.02	2510.9	2530.71	2501.97	2511	2544.92
	95	2502.12	2511.72	2506.54	2555.57	2568.95	2550.12	2563.74	2523.4	2513.6	2490.41	2525.38	2529.61	2495.78	2498.62	2502.24	2492.12	2510.08	2515.91	2541.87	2530.41	2519.72	2483	2518.59	2543.26	2474.8	2497.55	2498.62	2543.33	2521.86	2545.84	2538.73	2589.49	2520.51	2520.17	2506.88	2534.24	2476.76	2478.39	2505.44	2499.45	2490.3	2519.01	2537.77	2511.45	2530.2	2502.33	2511.42	2546.65
[truncated: 48 more columns]

## Sheet: Run Information
File Name	admin_2024-03-04 14-12-58_BR011103.pcrd
Created By User	admin
Notes
ID
Run Started	03/04/2024 06:13:12 UTC
Run Ended	03/04/2024 08:07:15 UTC
Sample Vol	10
Lid Temp	105
Protocol File Name	1.prcl
Plate Setup File Name	2.pltd
Base Serial Number	BR011103
Optical Head Serial Number	788BR10790
CFX Maestro Version	5.2.008.0222.
